# Supplementary material for: Efficient synthesis of bio-derived polycarbonates from dimethyl carbonate and isosorbide: regulating exo-OH and endo-OH reactivity by ionic liquids
Source: Royal Society of Chemistry journal article supplement (doi:10.1039/d0gc01804j), 2020-01-01
Supplement: d0gc01804j1.pdf [file d0gc01804j1.pdf]

## Supplemental Information to:

### Efficient synthesis of bio-derived polycarbonates from dimethyl carbonate and isosorbide: regulating *exo*-OH and *endo*-OH reactivity by ionic liquids

Wei Qian,<sup>a,b</sup> Xifei Ma,<sup>a,b</sup> Lei Liu,<sup>a</sup> Lili Deng,<sup>a,b</sup> Qian Su,<sup>a</sup> Ruibing Bai,<sup>a</sup> Zengliang Zhang,<sup>a</sup> Haibin Gou,<sup>a,b</sup> Li Dong,<sup>a</sup> Weiguo Cheng\*<sup>a</sup> and Fei Xu<sup>a</sup>

<sup>a</sup>Beijing Key Laboratory of Ionic Liquids Clean Process, CAS Key Laboratory of Green Process and Engineering, State Key Laboratory of Multiphase Complex Systems, Innovation Academy for Green Manufacture, CAS, Institute of Process Engineering, Chinese Academy of Sciences, Beijing 100190 (P.R. China).

<sup>b</sup>School of Chemical Engineering, University of Chinese Academy of Sciences, 19A Yuquan Road, Shijingshan District. Beijing 100049 (P.R. China).

\*Email: [wgcheng@ipe.ac.cn](mailto:wgcheng@ipe.ac.cn)

## Content

|                                                                                                 |    |
|-------------------------------------------------------------------------------------------------|----|
| 1. Materials.....                                                                               | 2  |
| 2. Characterizations.....                                                                       | 2  |
| 3. Characterization of ILs.....                                                                 | 3  |
| 4. Characterization of carboxymethyl products.....                                              | 6  |
| 5. The thermability of IL catalysts.....                                                        | 12 |
| 6. Influence of reaction parameters on PIC molecular weight.....                                | 12 |
| 7. The <sup>13</sup> C NMR analysis of PIC.....                                                 | 14 |
| 8. The correlation of thermal behaviors with the molecular weight.....                          | 14 |
| 9. In-situ <sup>1</sup> H NMR of transesterification products with the reaction progressed..... | 15 |
| 10. GPC charts of PICs.....                                                                     | 15 |
| References.....                                                                                 | 27 |

## 1. Materials

Dimethyl Isosorbide (IS, 98%) was received from Alfa Aesar. Dimethyl carbonate (DMC, 99%, anhydrous), tetrabutylphosphonium bromide ( $[P_{4444}]Br$ , 98%), tetrabutylammonium bromide ( $[N_{4444}]Br$ , 99%), 1-methylimidazole (99%), bromoethane (99%), n-butyl bromide (99%), 1-bromooctane (98%), and 1-bromodecane (98%) were purchased from Aladdin biochemical technology Co., Ltd., (Shanghai, China). Additionally, isosorbide was recrystallized with acetone. The others were used as received without further purification.

## 2. Characterizations

The molecular weights of all PIC samples were measured employing an Agilent PL-GPC 50 gel permeation chromatography (GPC) and polystyrene was adopted to establish the standard curve with dimethylformamide (DMF) as the mobile phase. The selectivities of PIC intermediates were measured on a SHIMADZU LC-20AT HPLC with an InertSustain C18 chromatographic column and a differential refraction detector (RID) using methanol and  $H_2O$  as a mobile phase.<sup>1</sup> The  $^1H$  NMR and  $^{13}C$  NMR spectra were recorded on a Bruker AVANCE III HD 600 MHz NMR spectrometer with tetramethylsilane (TMS) as the internal reference using deuterated chloroform ( $CDCl_3$ ) or dimethylsulfoxide ( $DMSO-d_6$ ) as the solvent. Mass spectra data were collected on a Bruker micrQTOF-Q II mass spectrometer. An elemental analyzer (elementar vario EL cube) was used for measuring element content. The Br anion contents of ILs were measured using the  $AgNO_3$  titration method with a Mettler Toledo EasyPlus automated titrator. Water contents of ILs were determined by a Mettler Toledo V10S Karl-Fischer titrator. The thermogravimetric analysis (TGA) curves were recorded on a Setaram Labsys Evo thermal gravimetric analyzer with a heating rate of 10 °C/min under an  $N_2$  atmosphere. The glass transition temperature was

measured on a Mettler Toledo DSC 1 differential scanning calorimeter (DSC) with a heating rate of 10 °C/min and a nitrogen flow rate of 50 mL/min.

### 3. Characterization of ILs

#### 1-ethyl-3-methylimidazolium bromide ([Emim]Br)

$^1\text{H}$  NMR (600 MHz,  $\text{CDCl}_3$ ):  $\delta$  10.35 (s, 1H), 7.56 (m, 2H), 4.39 (m, 2H), 4.08 (s, 3H), 1.57 (t, 3H); MS (ESI):  $m/z$ : 110.17 [Emim], 301.20 [Emim] $_2$ Br; elemental analysis calcd (%) for  $\text{C}_6\text{H}_{11}\text{N}_2\text{Br}$ : C 37.72, H 5.80, N 14.66, Br 41.82; found: C 37.80, H 5.75, N 14.72, Br 41.31. Purity (Based on Br anion) = found (%) Br  $\times$  100% / calcd (%) Br = 98.78%. Water content: 0.12 wt%.

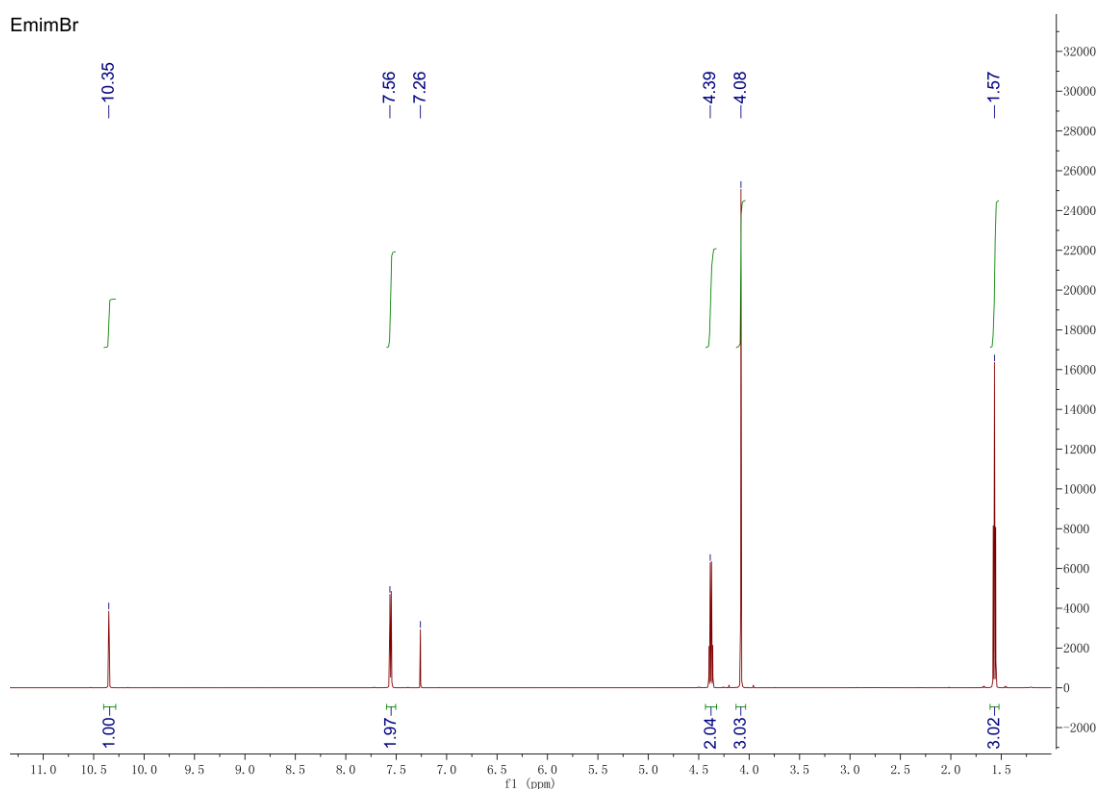

### 1-butyl-3-methylimidazolium bromide ([Bmim]Br)

$^1\text{H}$  NMR (600 MHz,  $\text{CDCl}_3$ ):  $\delta$  10.33 (s, 1H), 7.59 (t, 1H), 7.47 (t, 1H), 4.29 (t, 2H), 4.08 (s, 3H), 1.86 (m, 2H), 1.33 (m, 2H), 0.91 (t, 3H); MS (ESI):  $m/z$ : 139.18 [Bmim], 357.19 [Bmim] $_2$ Br; elemental analysis calcd (%) for  $\text{C}_8\text{H}_{15}\text{N}_2\text{Br}$ : C 43.85, H 6.90, N 12.78, Br 36.47; found: C 43.78, H 6.94, N 12.83, Br 35.85. Purity (Based on Br anion) = found (%) Br  $\times$  100% / calcd (%) Br = 98.30%. Water content: 0.13 wt%.

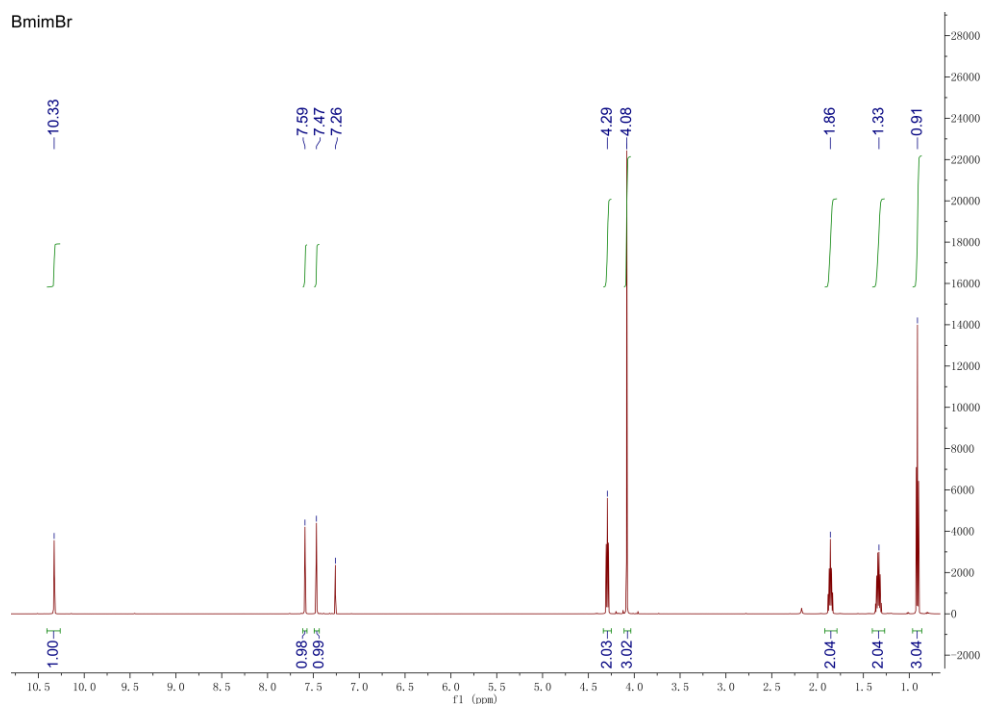

### 1-octyl-3-methylimidazolium bromide ([Omim]Br)

$^1\text{H}$  NMR (600 MHz,  $\text{CDCl}_3$ ):  $\delta$  10.37 (s, 1H), 7.59 (t, 1H), 7.42 (t, 1H), 4.28 (t, 2H), 4.09 (s, 3H), 1.87 (m, 2H), 1.22 (m, 10H), 0.82 (t, 3H); MS (ESI):  $m/z$ : 195.19 [Omim], 469.35 [Omim] $_2$ Br; elemental analysis calcd (%) for  $\text{C}_{12}\text{H}_{23}\text{N}_2\text{Br}$ : C 52.37, H 8.42, N 10.18, Br 29.03; found: C 52.41, H 8.46, N 10.13, Br 28.66. Purity (Based on Br anion) = found (%) Br  $\times$  100% / calcd (%) Br = 98.73%. Water content: 0.08 wt%.

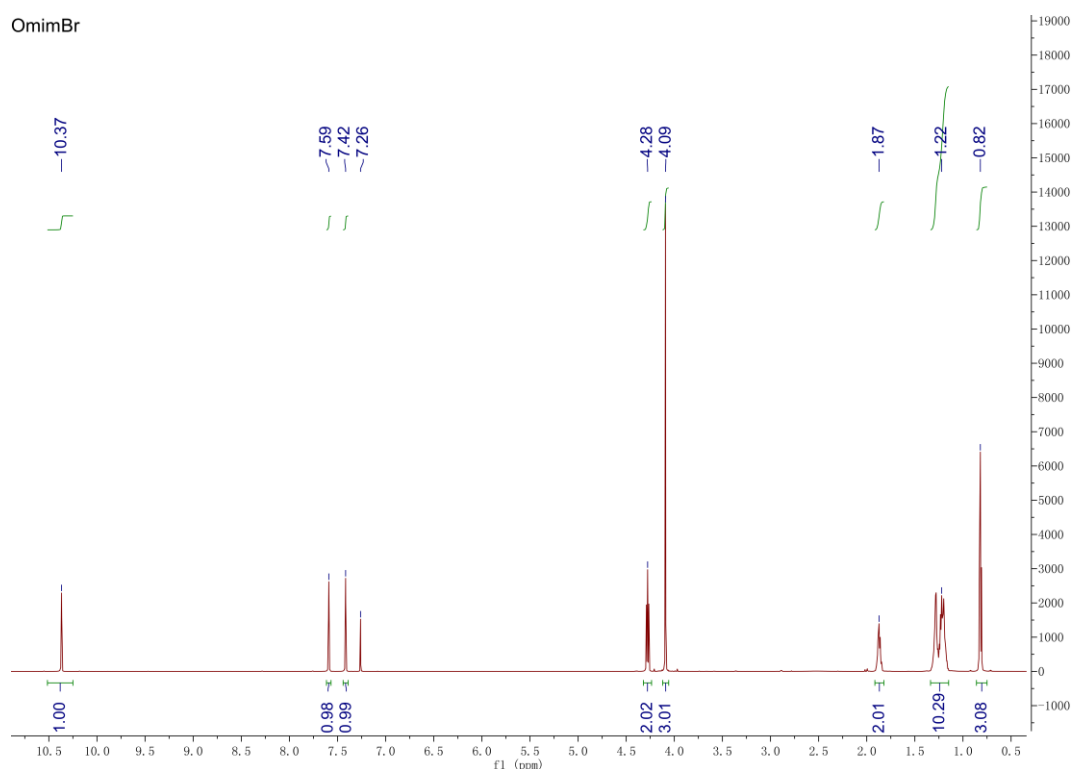

### 1-decyl-3-methylimidazolium bromide ([Dmim]Br)

$^1\text{H}$  NMR (600 MHz,  $\text{CDCl}_3$ ):  $\delta$  10.40 (s, 1H), 7.57 (t, 1H), 7.40 (t, 1H), 4.28 (t, 2H), 4.10 (s, 3H), 1.88 (m, 2H), 1.21 (m, 14H), 0.83 (t, 3H); MS (ESI):  $m/z$ : 223.26 [Dmim], 529.29 [Dmim] $_2$ Br; elemental analysis calcd (%) for  $\text{C}_{14}\text{H}_{27}\text{N}_2\text{Br}$ : C 55.44, H 8.97, N 9.24, Br 26.35; found: C 55.51, H 8.90, N 9.29, Br 25.78. Purity (Based on Br anion) = found (%) Br  $\times$  100% / calcd (%) Br = 97.84%. Water content: 0.09 wt%.

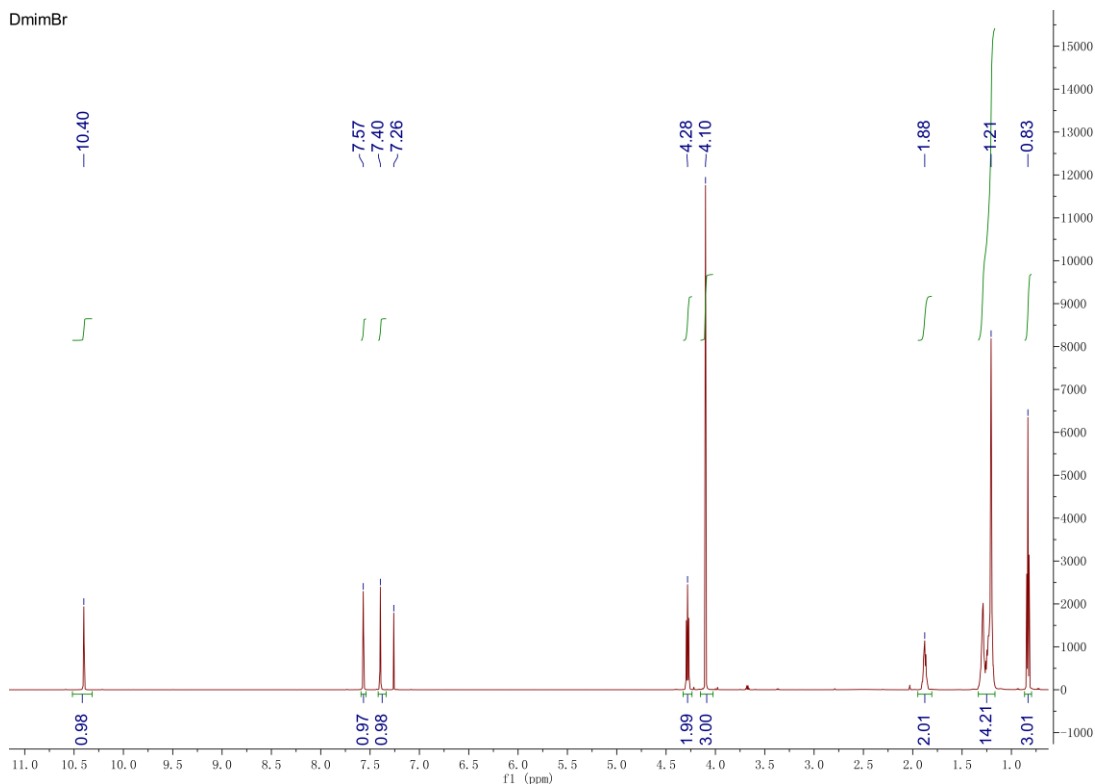

#### tetrabutylphosphonium bromide ([P<sub>4444</sub>]<sup>+</sup>Br<sup>-</sup>)

Water content: 0.04 wt%.

#### tetrabutylammonium bromide ([N<sub>4444</sub>]<sup>+</sup>Br<sup>-</sup>)

Water content: 0.08 wt%.

### 4. Characterization of carboxymethyl products

**DC:** C<sub>10</sub>H<sub>14</sub>O<sub>8</sub>; <sup>1</sup>H NMR (600 MHz, CDCl<sub>3</sub>): δ 5.10 (m, 2 H), 4.88 (t, 1H), 4.54 (d, 1H), 4.06 (d, 1H), 4.01 (m, 1H), 3.90 (m, 2H), 3.81 (s, 3H), 3.80 ppm (s, 3H); <sup>13</sup>C NMR (600 MHz, CDCl<sub>3</sub>): δ 155.24, 154.91, 86.00, 81.36, 80.98, 76.90, 73.39, 70.61, 55.28, 55.24 ppm; MS (ESI): m/z: 285.06 [DC+Na]<sup>+</sup>; elemental analysis calcd (%) for C<sub>10</sub>H<sub>14</sub>O<sub>8</sub>: C 45.81, H 5.38, O 48.81; found: C 45.78, H 5.37, O 48.82.

DC

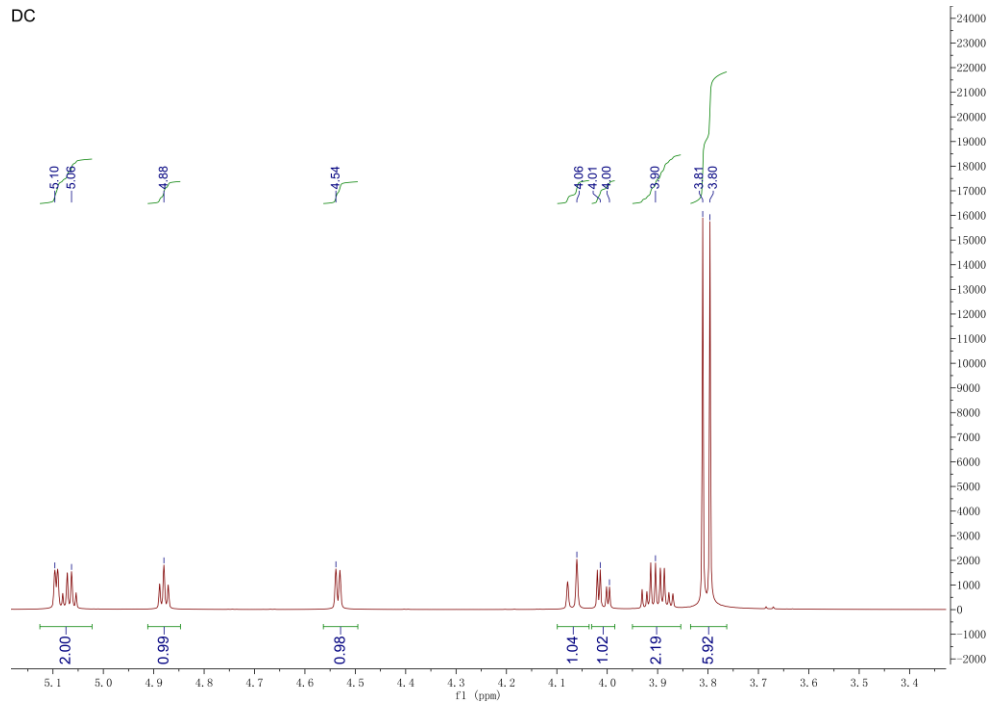

DC

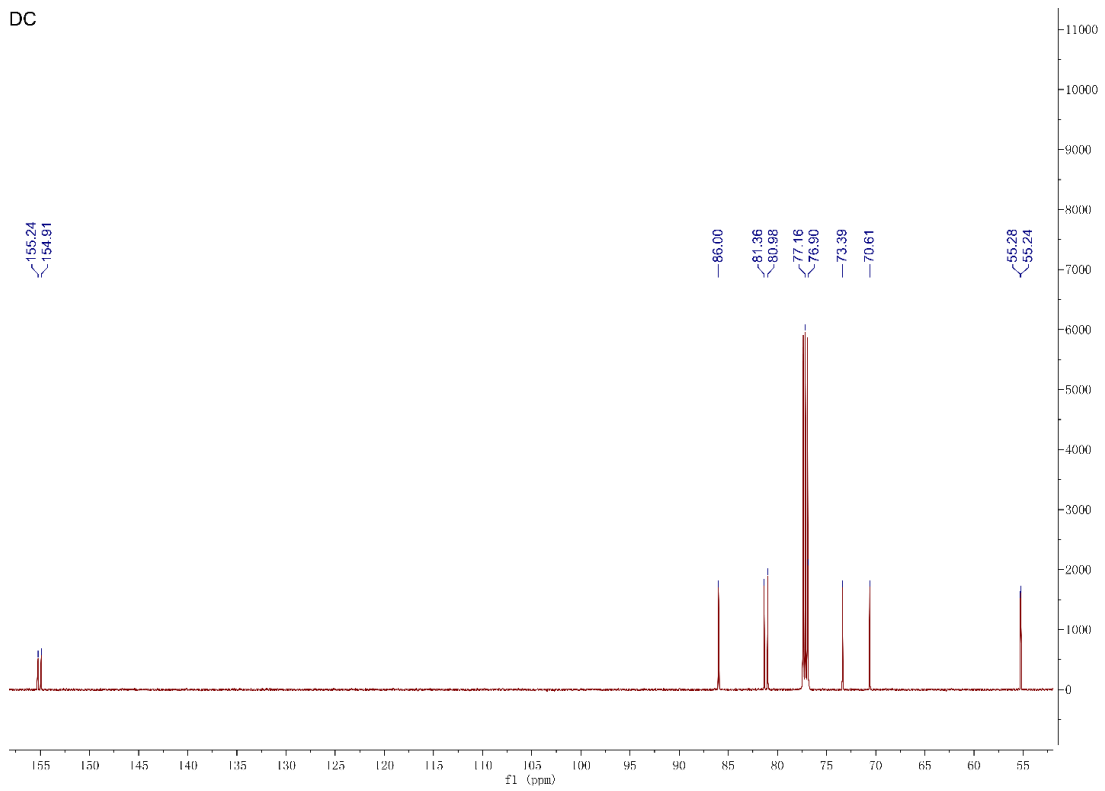

**MC-1:** C<sub>8</sub>H<sub>12</sub>O<sub>6</sub>; <sup>1</sup>H NMR (600 MHz, CDCl<sub>3</sub>): δ 5.13 (d, 1 H), 4.65 (t, 1 H), 4.53 (d, 1H), 4.31 (m, 1H), 4.02 (dd, 1H), 3.89 (m, 1H), 3.81 (s, 3H), 3.58 (m, 1 H), 2.50 ppm (s, 1H); <sup>13</sup>C NMR (600 MHz, CDCl<sub>3</sub>): δ 154.87, 85.51, 82.11, 81.71, 73.78, 73.42, 72.41, 55.28 ppm; MS (ESI): m/z: 227.06 [MC-1+Na]<sup>+</sup>; elemental analysis calcd (%) for C<sub>8</sub>H<sub>12</sub>O<sub>6</sub>: C 47.06, H 5.92, O 47.02; found: C 47.08, H 5.88, O 46.98.

MC-1

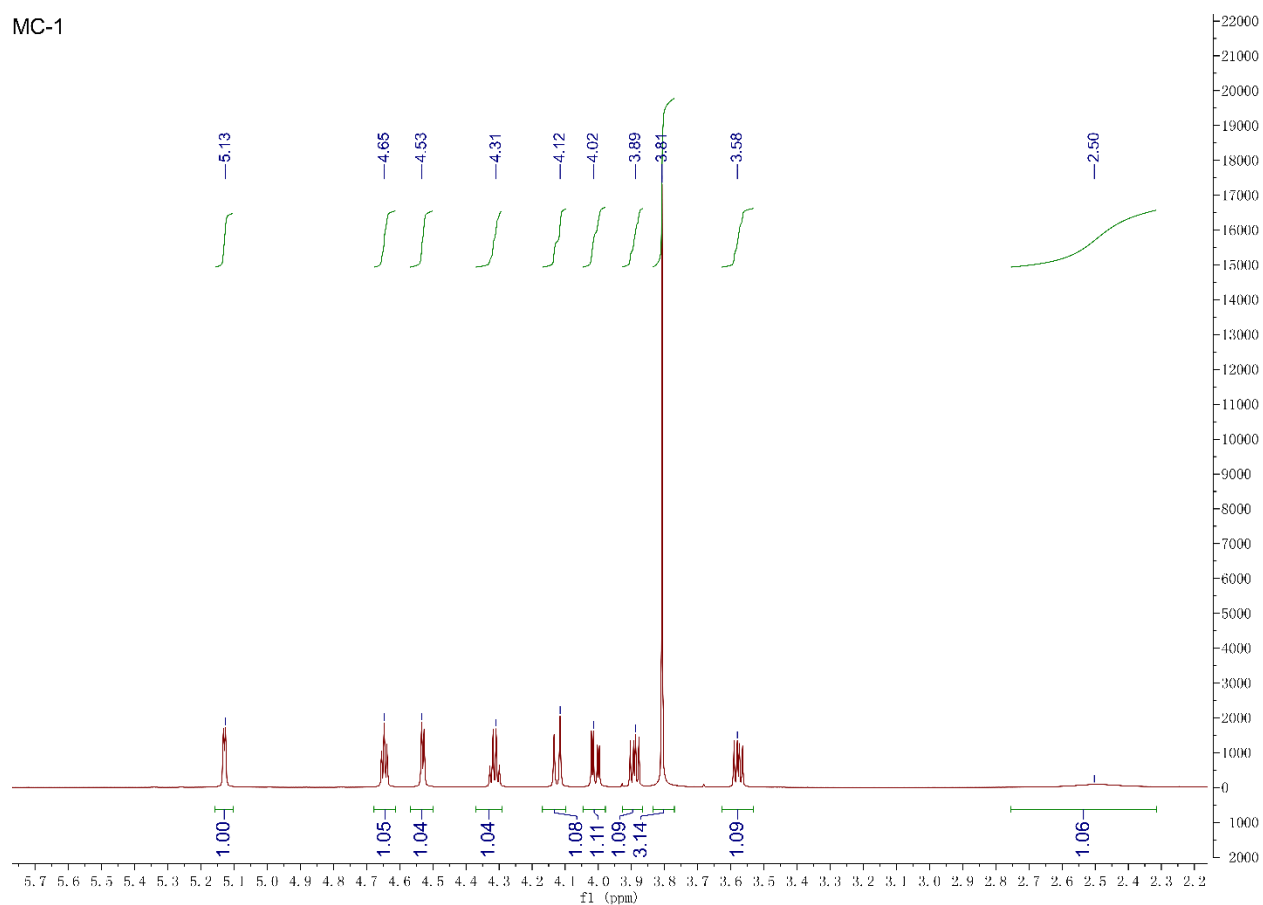



MC-1

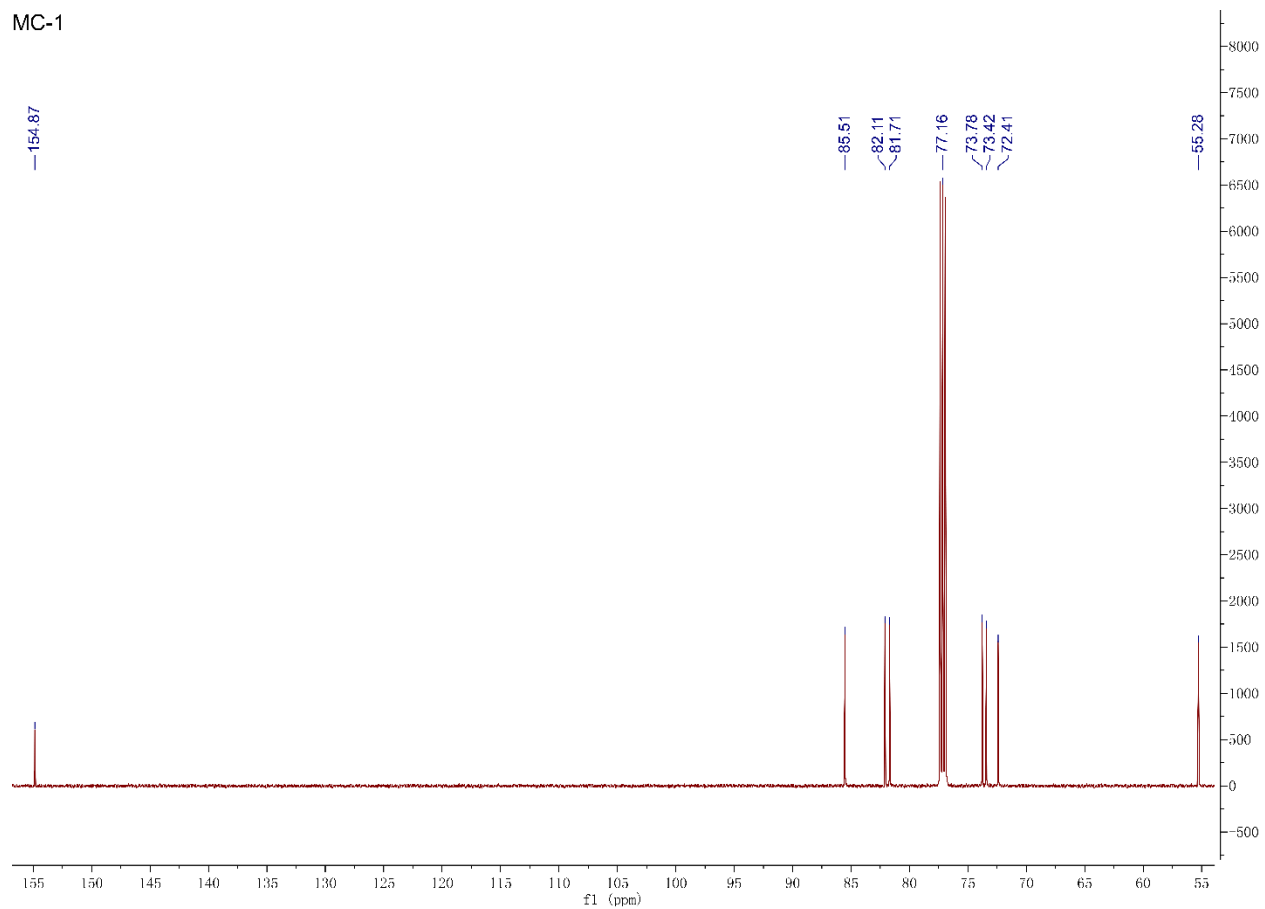

**MC-2:** C<sub>8</sub>H<sub>12</sub>O<sub>6</sub>; <sup>1</sup>H NMR (600 MHz, CDCl<sub>3</sub>): δ 5.04 (m, 1H), 4.87 (t, 1H), 4.39 (d, 1H), 4.31 (d, 1H), 3.90 (m, 4H), 3.80 (s, 3H), 2.41 ppm (s, 1H); <sup>13</sup>C NMR (600 MHz, CDCl<sub>3</sub>): δ 155.41, 88.57, 80.63, 77.46, 76.28, 75.86, 70.54, 55.32 ppm; MS (ESI): m/z: 227.05 [MC-2+Na]<sup>+</sup>; elemental analysis calcd (%) for C<sub>8</sub>H<sub>12</sub>O<sub>6</sub>: C 47.06, H 5.92, O 47.02; found: C 47.08, H 5.85, O 47.03.

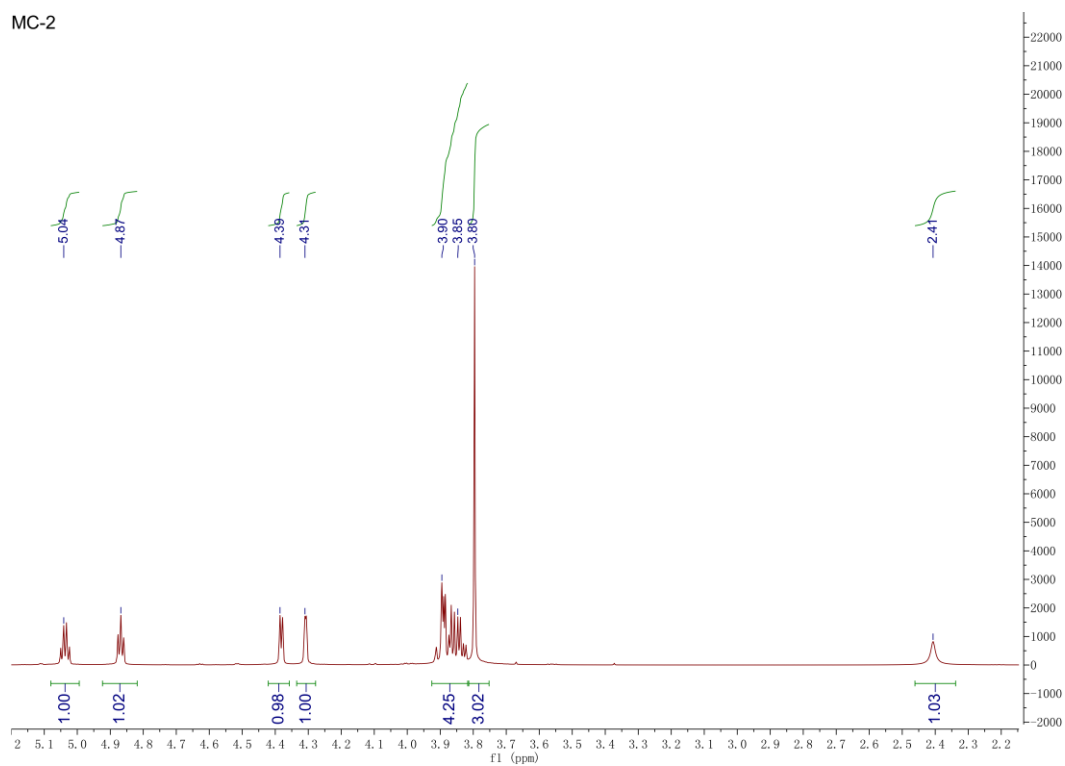

MC-2

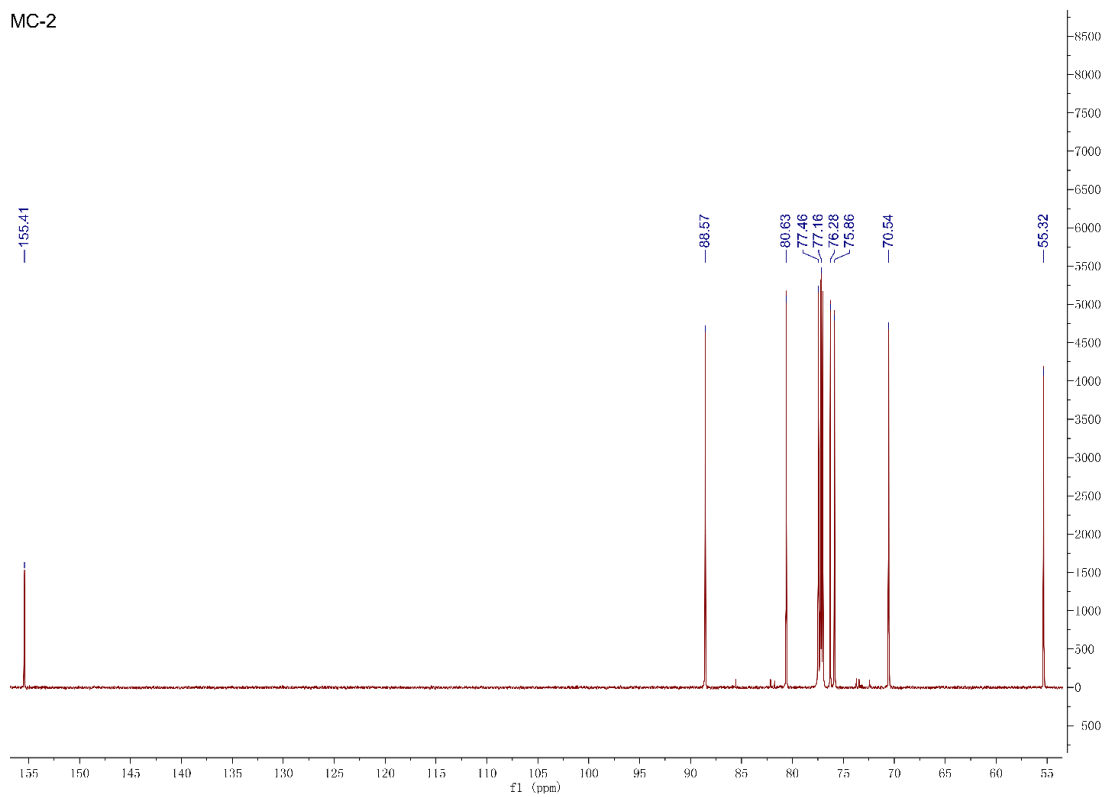

The standard curves of PIC intermediates were determined using isosorbide 5-mononitrate as the internal standard. Subsequently, the selectivities of PIC intermediates could be calculated using HPLC analysis.

## 5. The thermability of IL catalysts

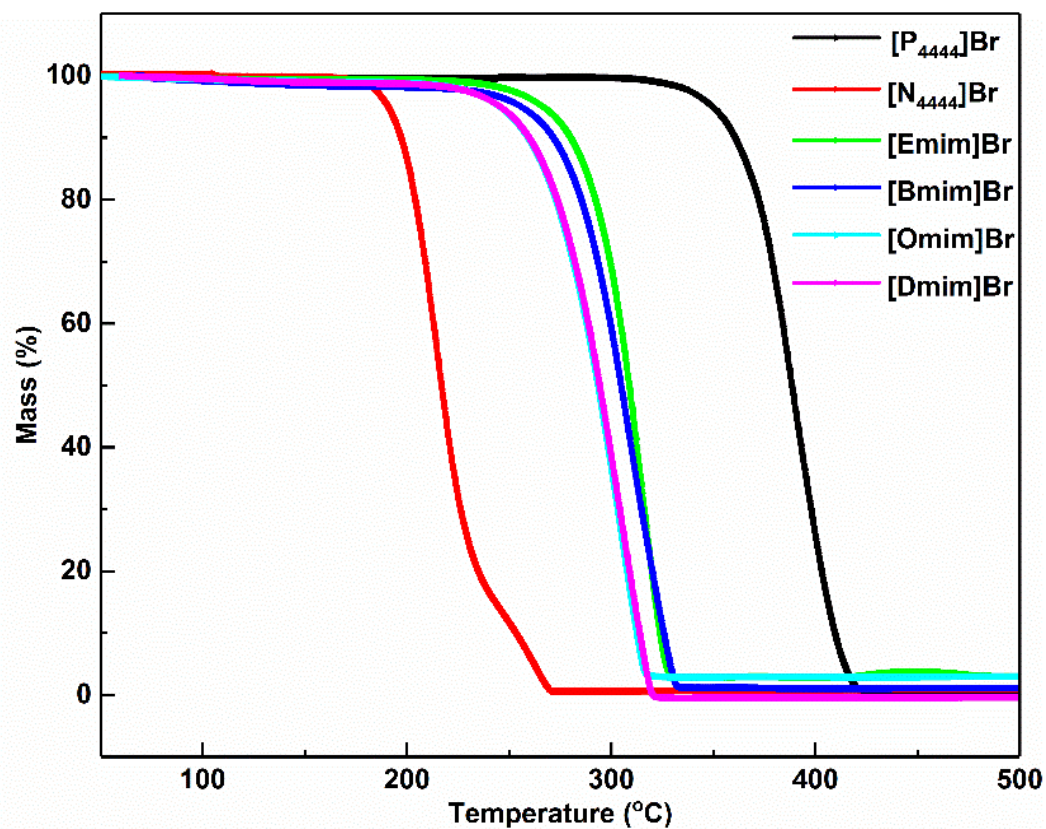

**Fig. S1** The thermostability of selected bromide-based IL catalysts.

## 6. Influence of reaction parameters on PIC molecular weight

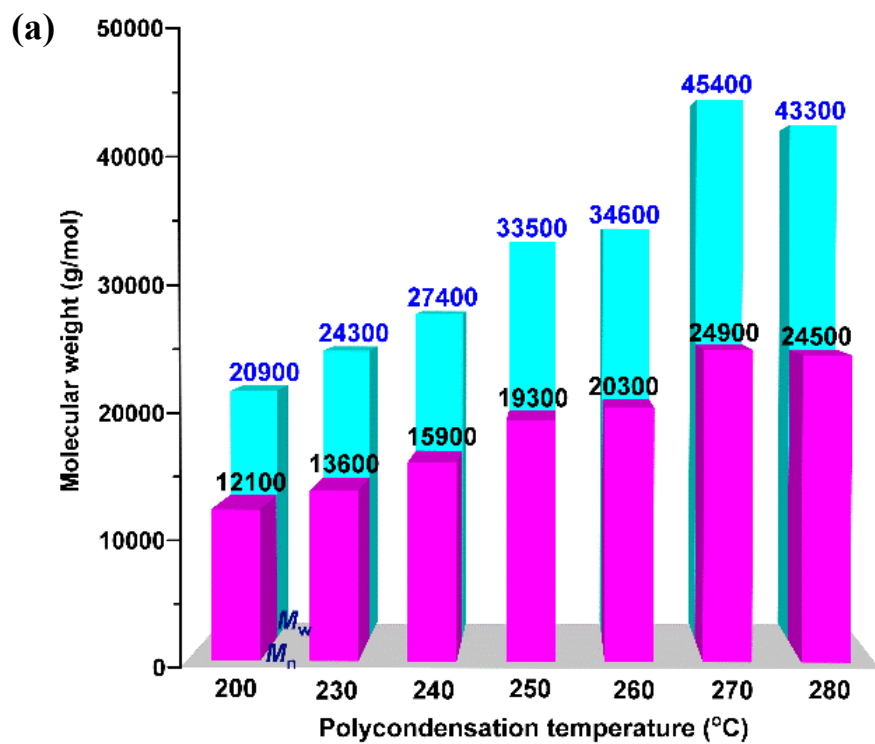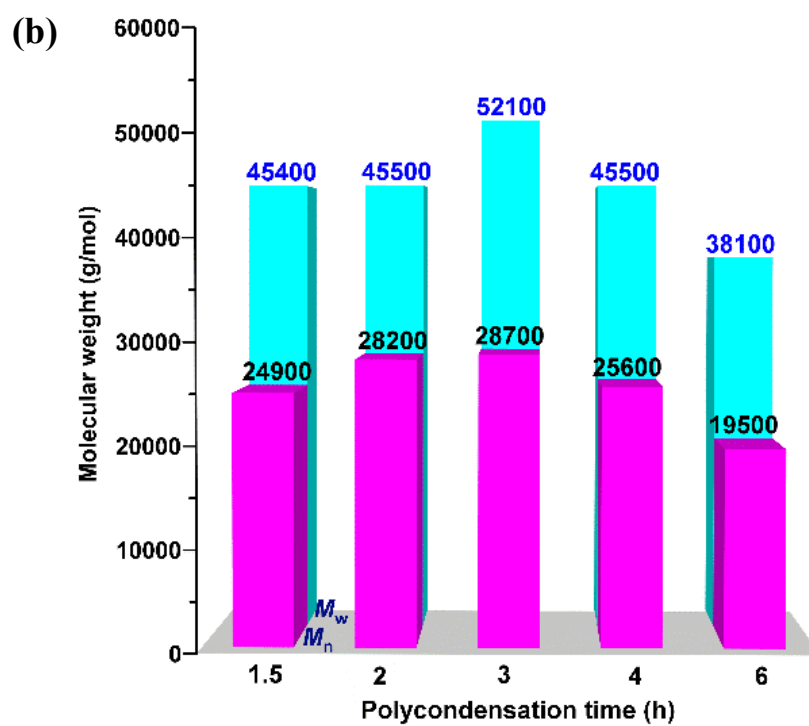

**Fig. S2** Influence of (a) polycondensation temperature and (b) polycondensation time on PIC molecular weight.

## 7. The $^{13}\text{C}$ NMR analysis of PIC

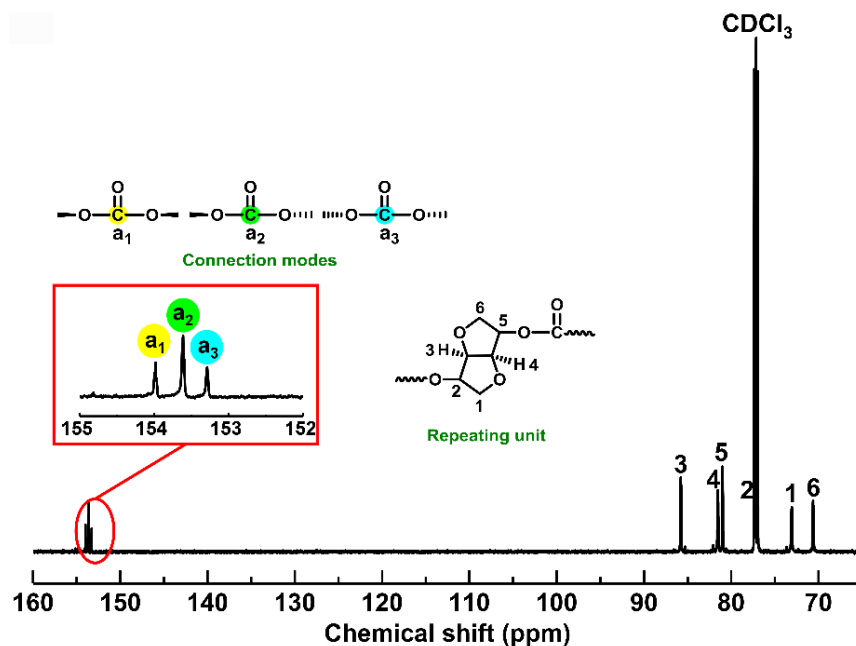

**Fig. S3.** Typical chemical structure of PIC identified through the spectra of  $^{13}\text{C}$  NMR catalyzed by [Emim]Br.

## 8. The correlation of thermal behaviors with the molecular weight

**Table S1.** The correlation of thermal behaviors with molecular weight.

| Entry | PT ( $^{\circ}\text{C}$ ) | $T_{d-5\%}$ ( $^{\circ}\text{C}$ ) | $T_g$ ( $^{\circ}\text{C}$ ) | $M_w$ (kg/mol) |
|-------|---------------------------|------------------------------------|------------------------------|----------------|
| 1     | 200                       | 317                                | 138                          | 20.9           |
| 2     | 230                       | 322                                | 141                          | 24.3           |
| 3     | 240                       | 325                                | 146                          | 27.4           |
| 4     | 250                       | 329                                | 150                          | 33.5           |
| 5     | 260                       | 330                                | 150                          | 34.6           |
| 6     | 270                       | 336                                | 156                          | 45.4           |
| 7     | 280                       | 334                                | 155                          | 43.3           |

PT represents polycondensation temperature.

## 9. In-situ <sup>1</sup>H NMR of transesterification products with the reaction progressed

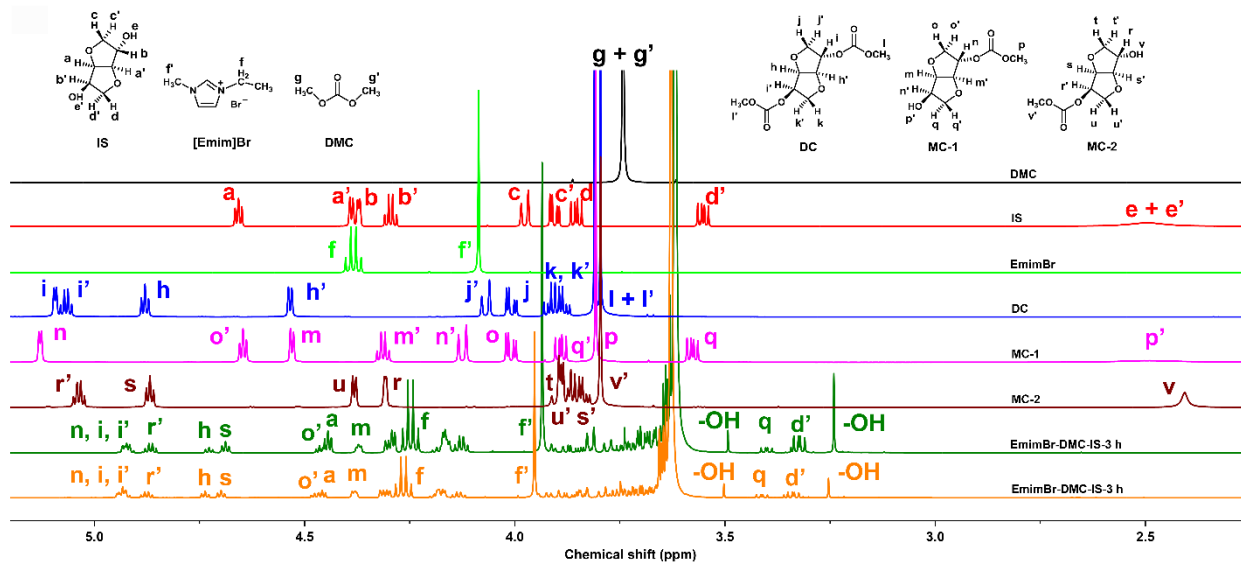

**Fig. S4** Chemical shift of proton of transesterification products with the reaction progressed.

## 10. GPC charts of PICs

### (1) Influence of cation structure of IL

#### MW Averages

Mp: 5966

Mn: 4227

Mv: 6382

Mw: 6846

Mz: 10604

Mz+1: 15584

PD: 1.6196

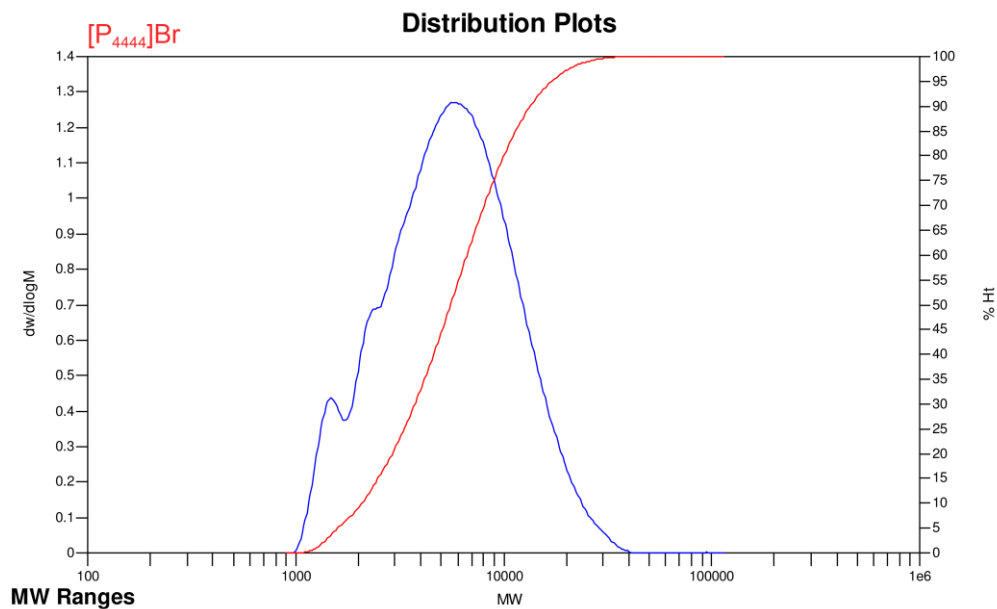

**MW Averages**

Mp: 11479      Mn: 7501      Mv: 12961      Mw: 14090  
Mz: 22834      Mz+1: 31879      PD: 1.8784

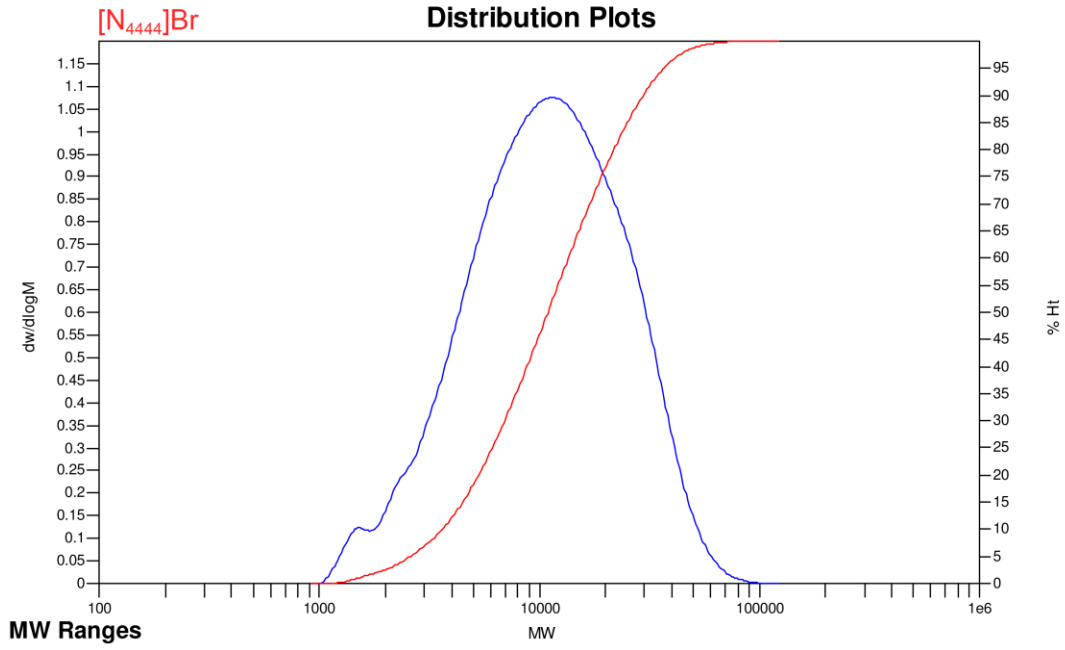

**MW Averages**

Mp: 16350      Mn: 11476      Mv: 17651      Mw: 18860  
Mz: 27921      Mz+1: 37351      PD: 1.6434

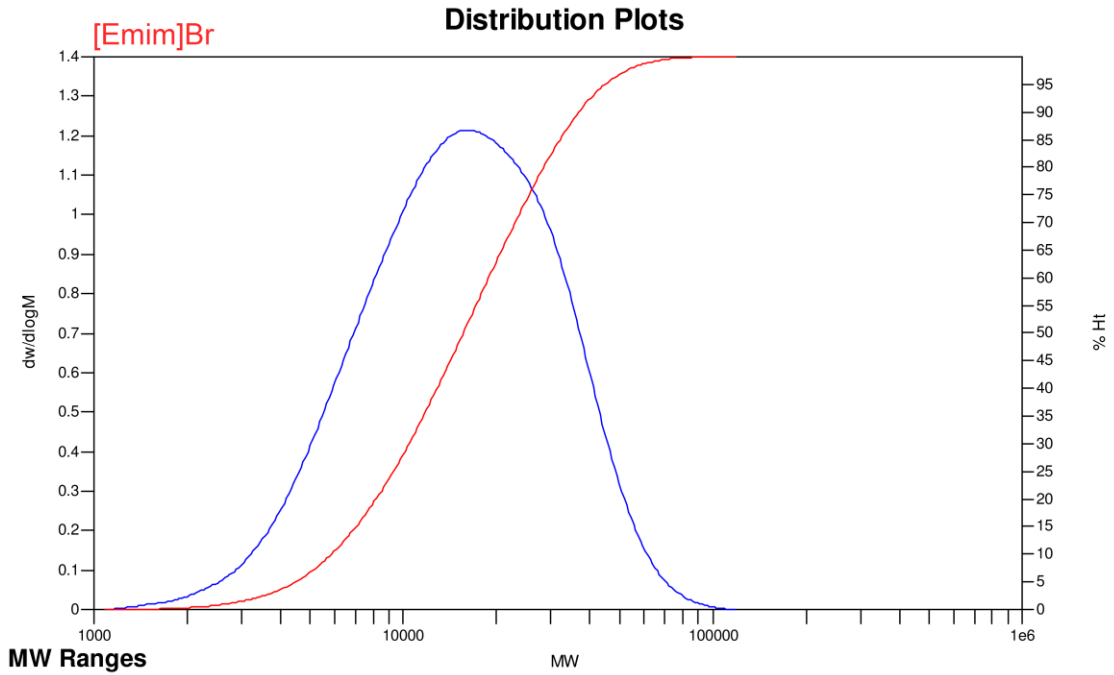



**MW Averages**

Mp: 8961                      Mn: 6843                      Mv: 10135                      Mw: 10827  
Mz: 16336                      Mz+1: 22916                      PD: 1.5822

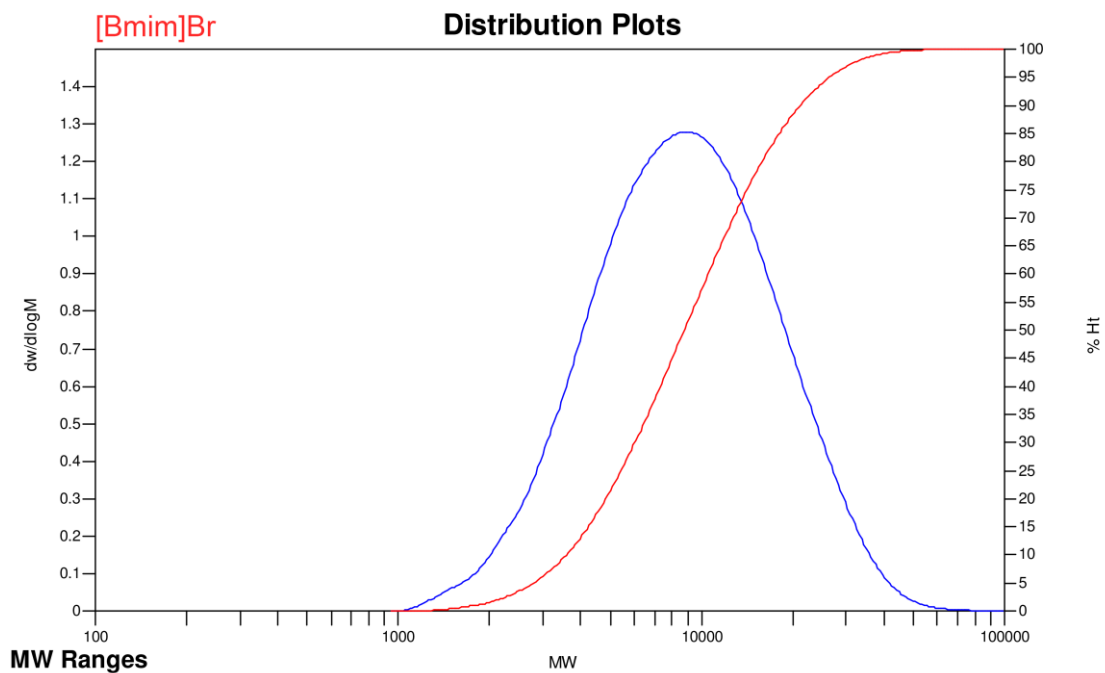

**MW Averages**

Mp: 7120                      Mn: 6400                      Mv: 8845                      Mw: 9387  
Mz: 14042                      Mz+1: 20835                      PD: 1.4667

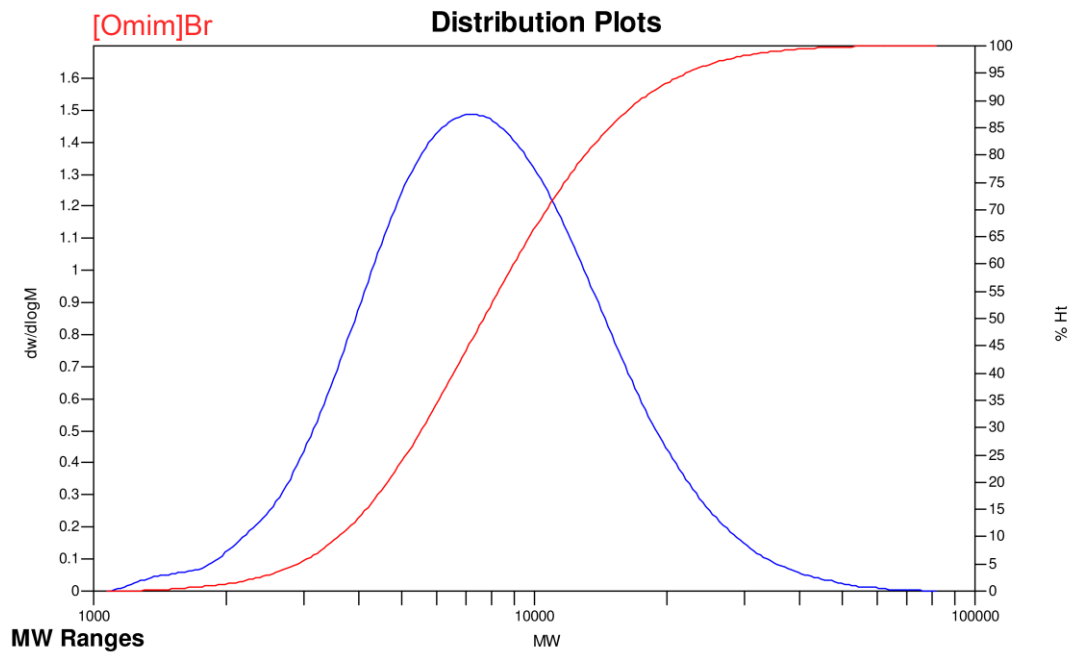

**MW Averages**

Mp: 5657                      Mn: 5385                      Mv: 7028                      Mw: 7387  
Mz: 10441                      Mz+1: 15030                      PD: 1.3718

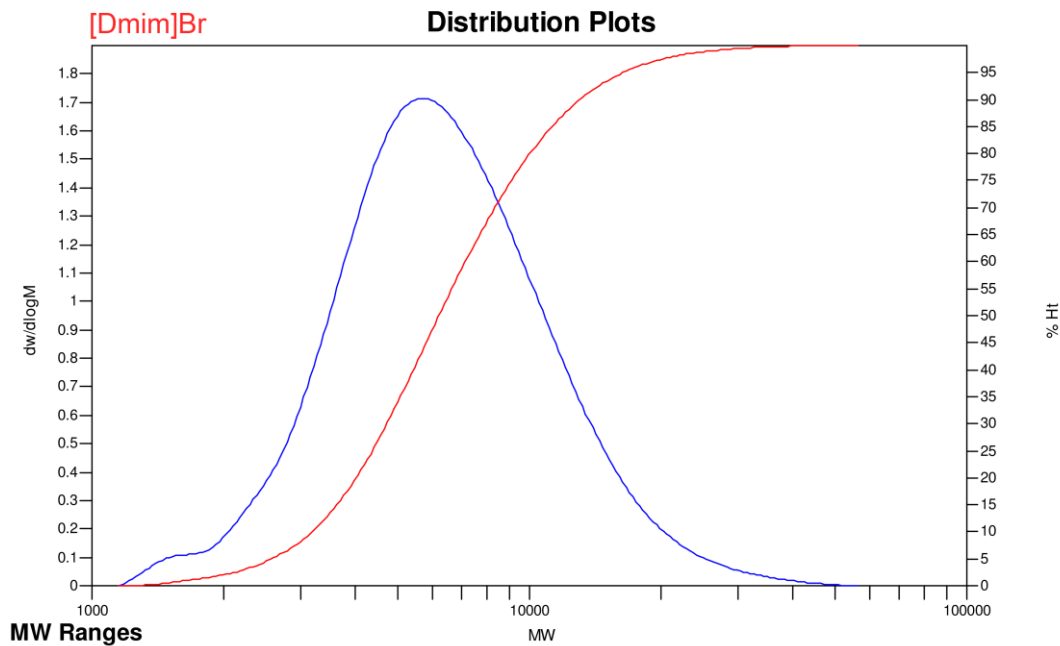

**(2) Influence of reaction parameters catalyzed by [Emim]Br**

**MW Averages**

Mp: 6403                      Mn: 6196                      Mv: 8182                      Mw: 8634  
Mz: 12550                      Mz+1: 18302                      PD: 1.3935

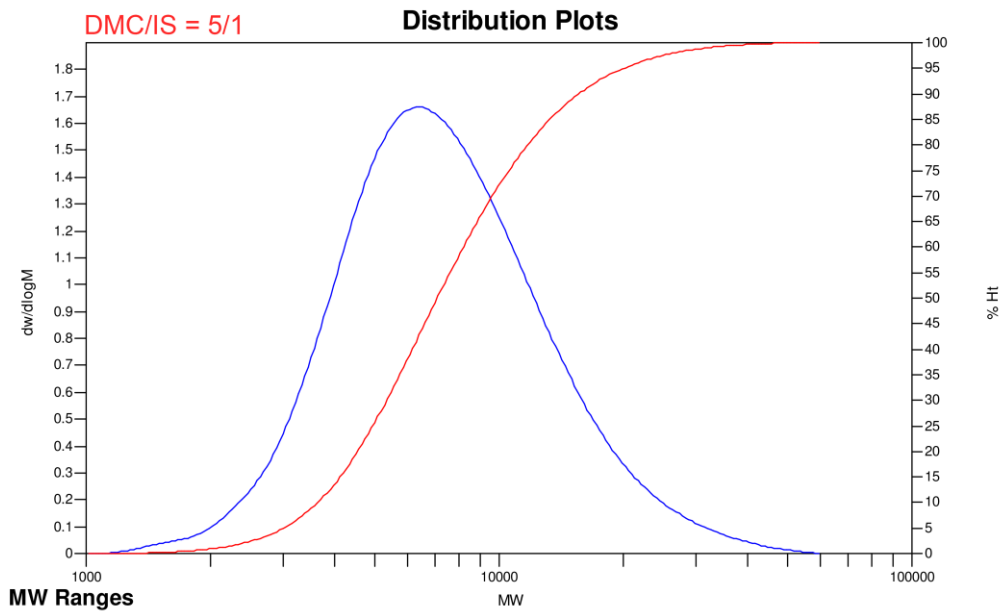

**MW Averages**

Mp: 16350      Mn: 11476      Mv: 17651      Mw: 18860  
Mz: 27921      Mz+1: 37351      PD: 1.6434

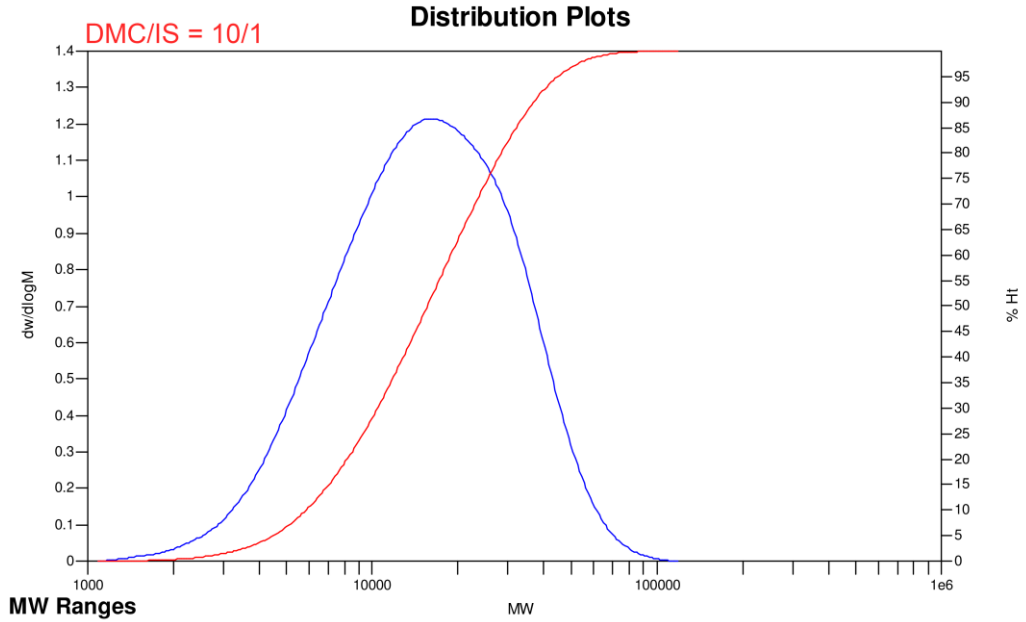

**MW Averages**

Mp: 14966      Mn: 10429      Mv: 15847      Mw: 16908  
Mz: 24772      Mz+1: 32731      PD: 1.6212

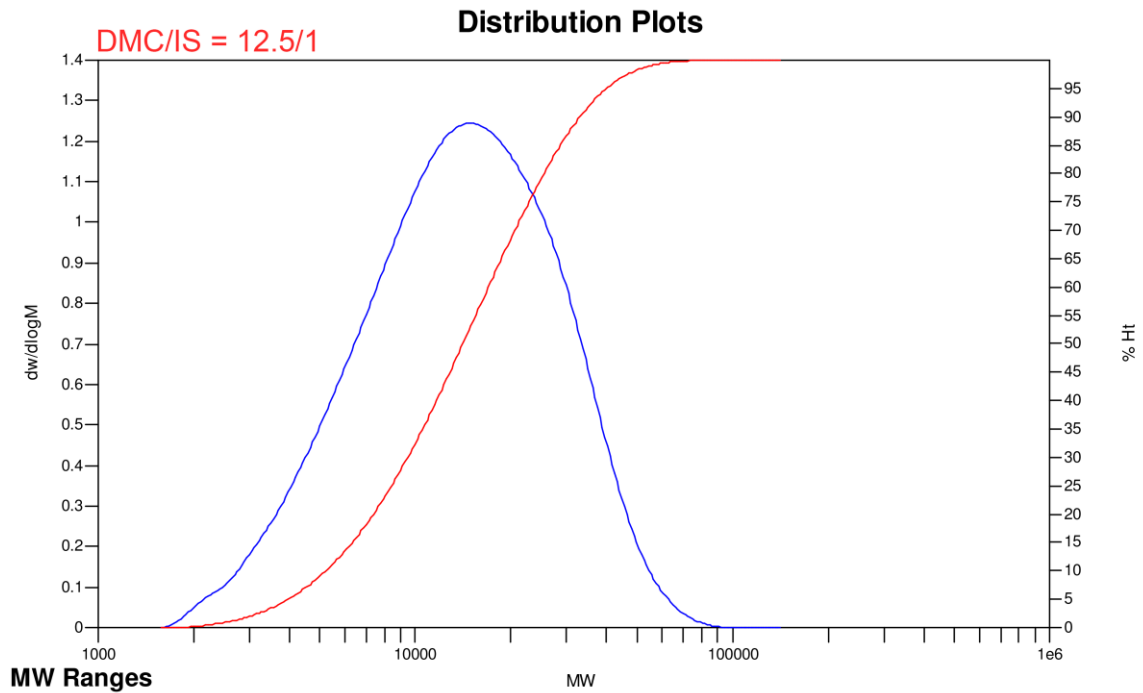

**MW Averages**

Mp: 14704                      Mn: 9834                      Mv: 15616                      Mw: 16705  
Mz: 24620                      Mz+1: 32207                      PD: 1.6987

**Distribution Plots**

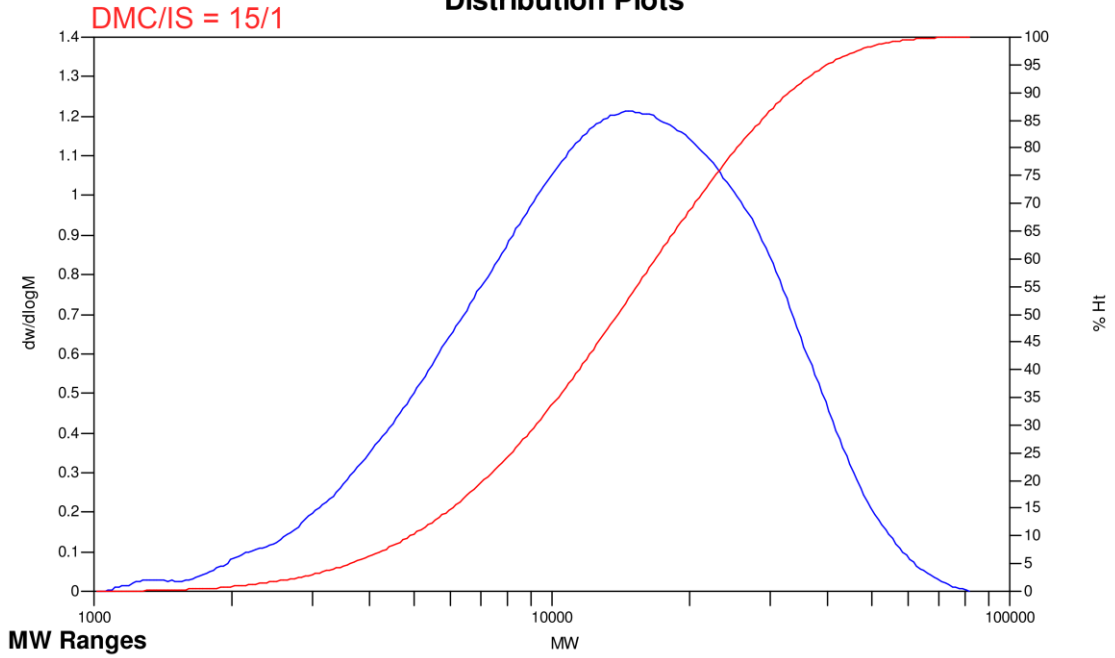

**MW Ranges**

**MW Averages**

Mp: 2507                      Mn: 4048                      Mv: 8544                      Mw: 9854  
Mz: 21208                      Mz+1: 30568                      PD: 2.4343

**Transesterification time 3.5 h Distribution Plots**

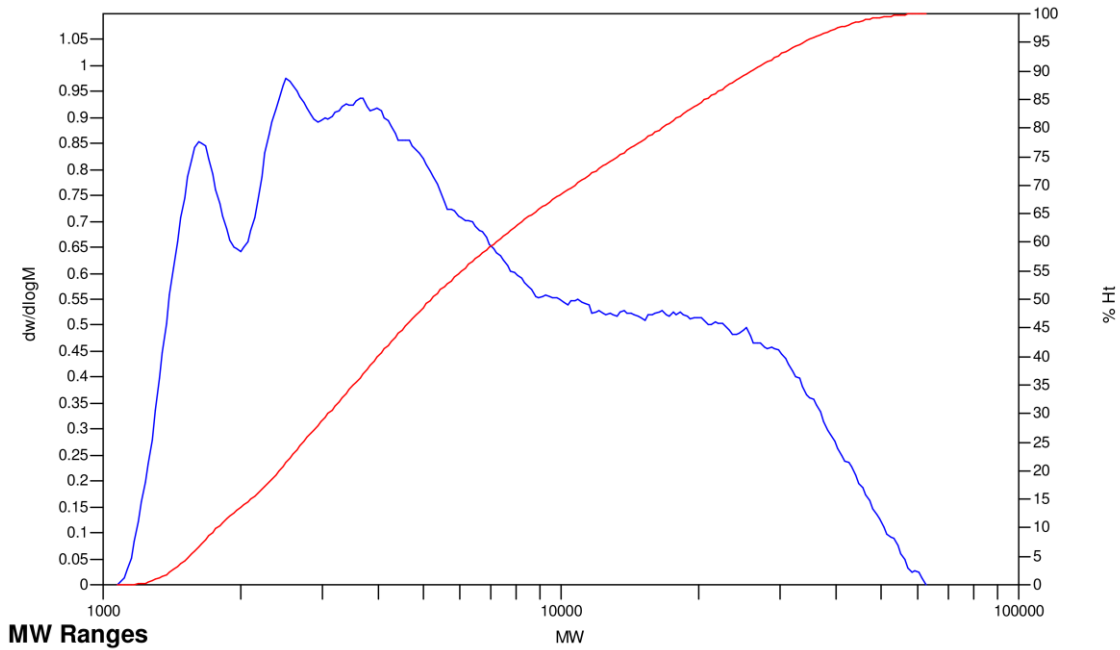

**MW Ranges**

**MW Averages**

Mp: 18836                      Mn: 12109                      Mv: 19464                      Mw: 20883  
Mz: 31389                      Mz+1: 41912                      PD: 1.7246

**Transesterification time 6 h      Distribution Plots**

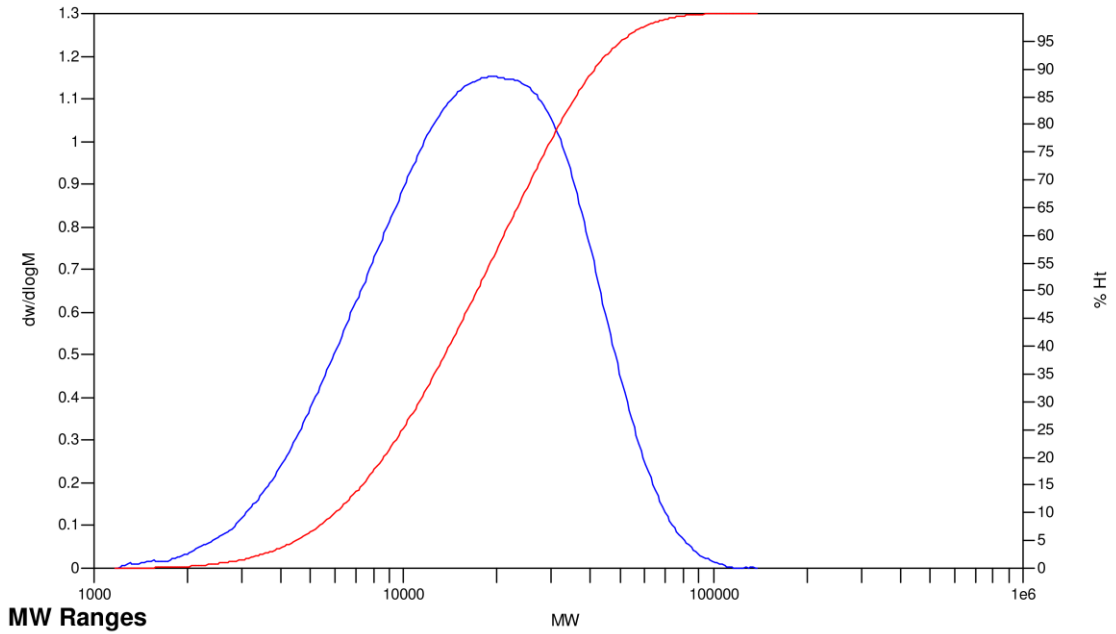

**MW Averages**

Mp: 16064                      Mn: 10429                      Mv: 16718                      Mw: 17921  
Mz: 26759                      Mz+1: 35389                      PD: 1.7184

**Transesterification time 8 h      Distribution Plots**

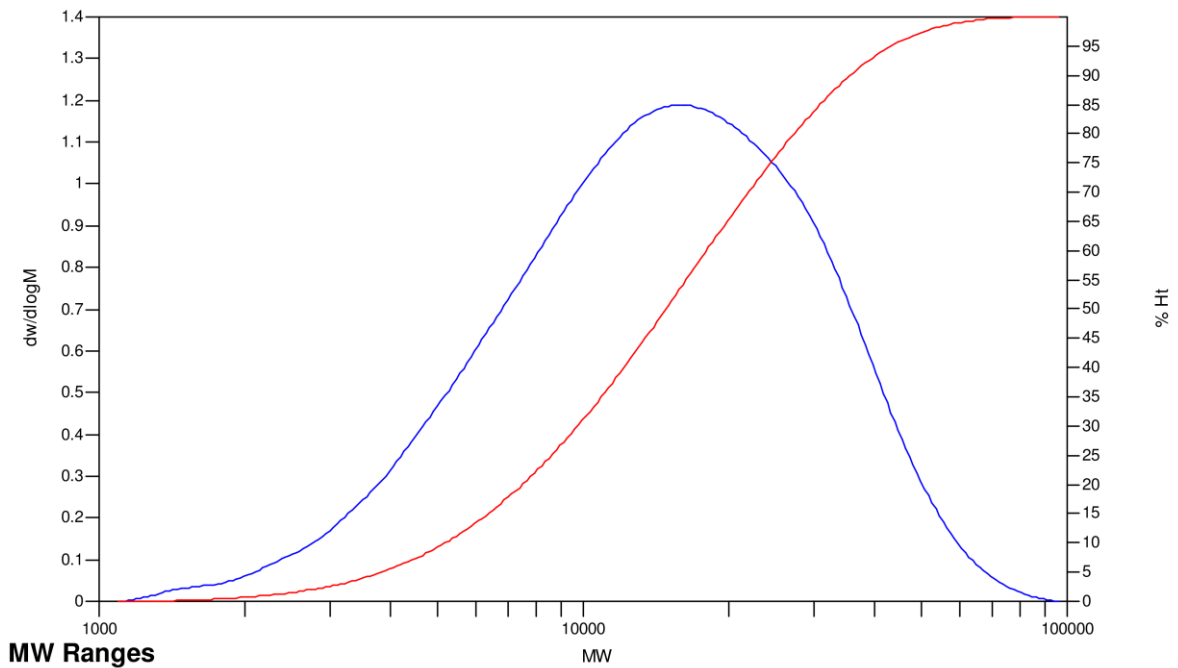

**MW Averages**

Mp: 14704                      Mn: 9005                      Mv: 15146                      Mw: 16337  
Mz: 25317                      Mz+1: 34655                      PD: 1.8142

**Tranesertification time 10 h Distribution Plots**

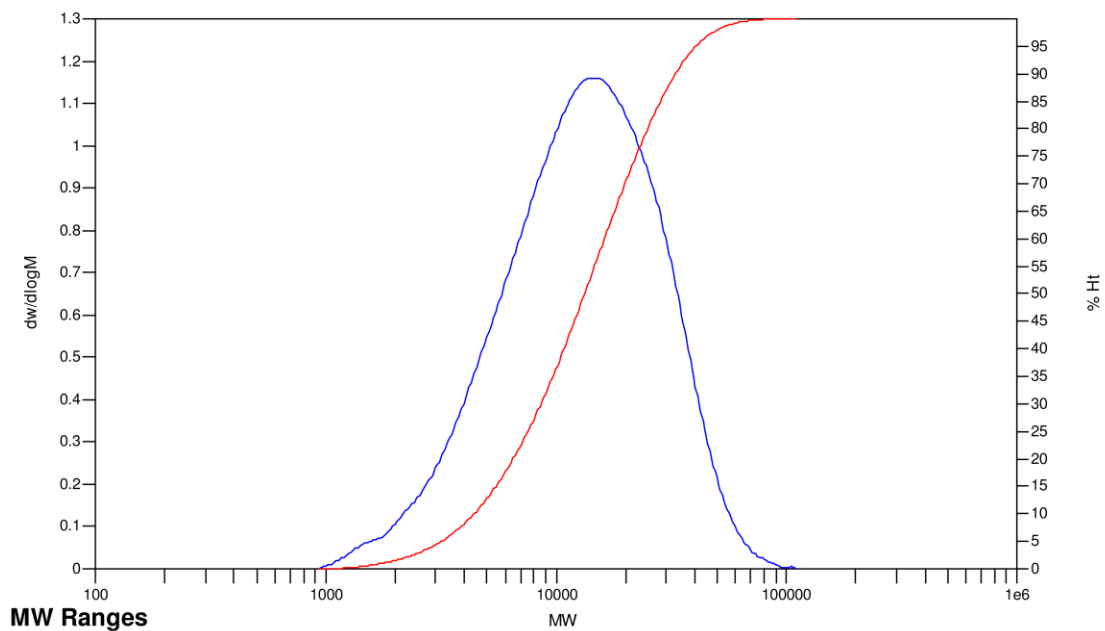

**MW Averages**

Mp: 26359                      Mn: 13639                      Mv: 22573                      Mw: 24306  
Mz: 37808                      Mz+1: 54426                      PD: 1.7821

**230 °C Distribution Plots**

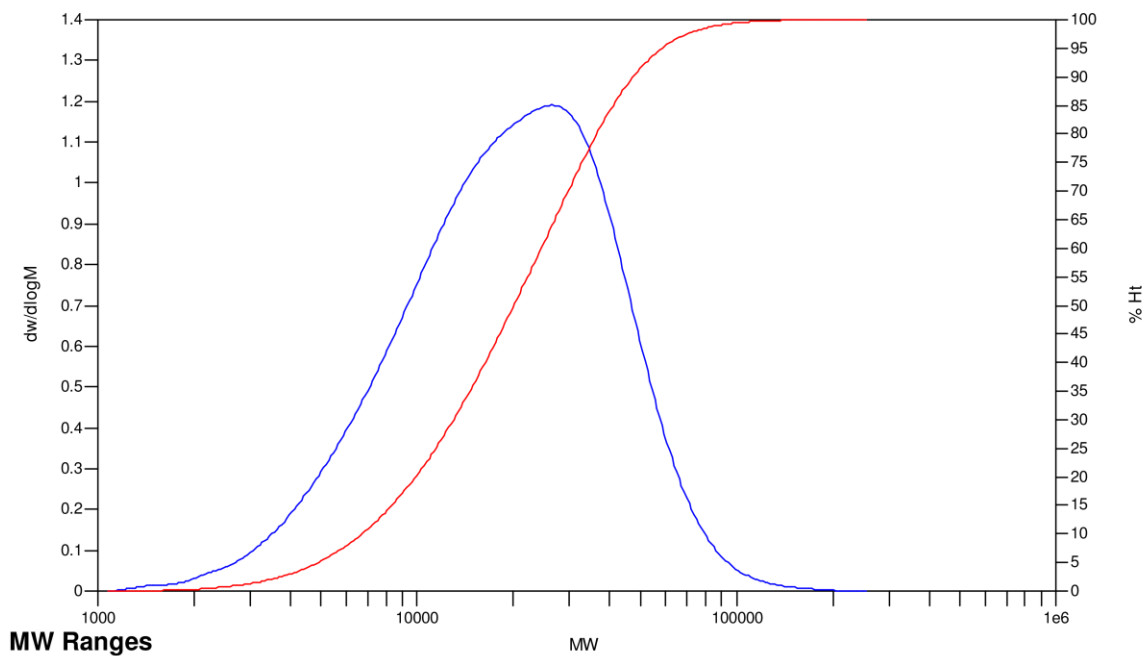

**MW Averages**

Mp: 29834      Mn: 15868      Mv: 25561      Mw: 27438  
Mz: 41377      Mz+1: 55468      PD: 1.7291

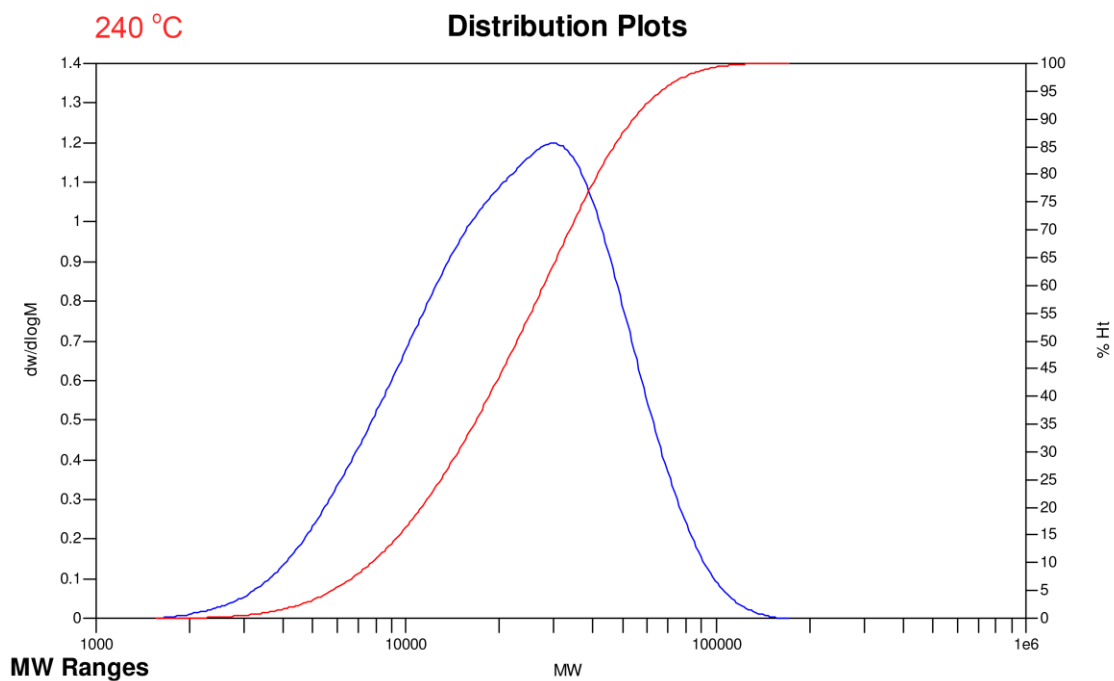

**MW Averages**

Mp: 35606      Mn: 19315      Mv: 31393      Mw: 33532  
Mz: 48811      Mz+1: 63878      PD: 1.7361

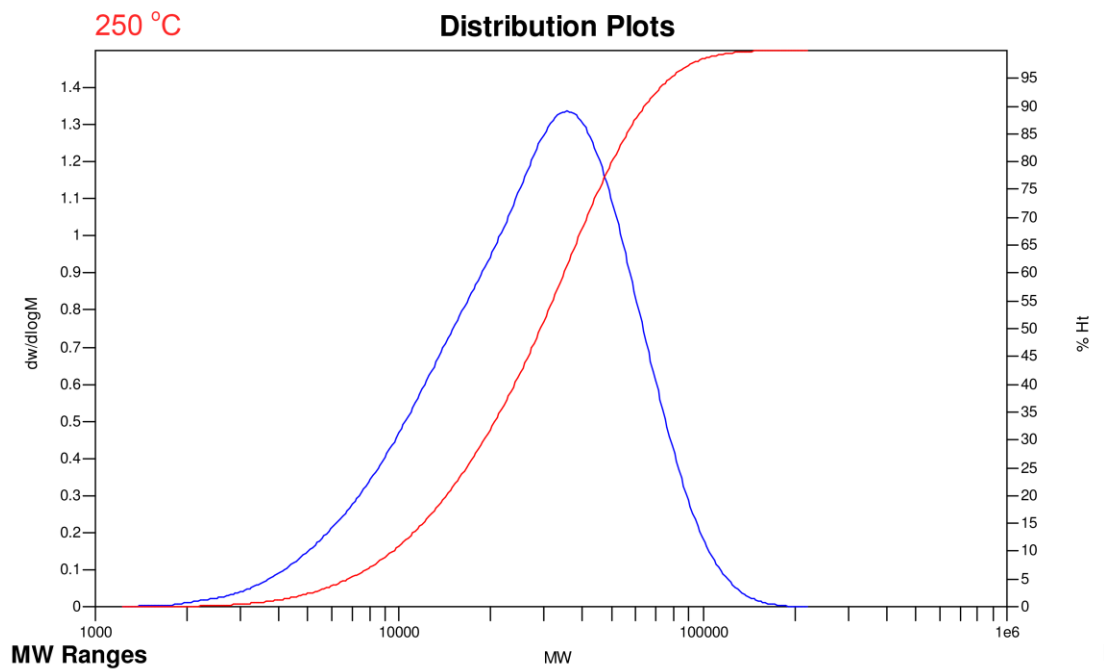

**MW Averages**

Mp: 36242      Mn: 20297      Mv: 32366      Mw: 34606  
Mz: 50839      Mz+1: 66890      PD: 1.7050

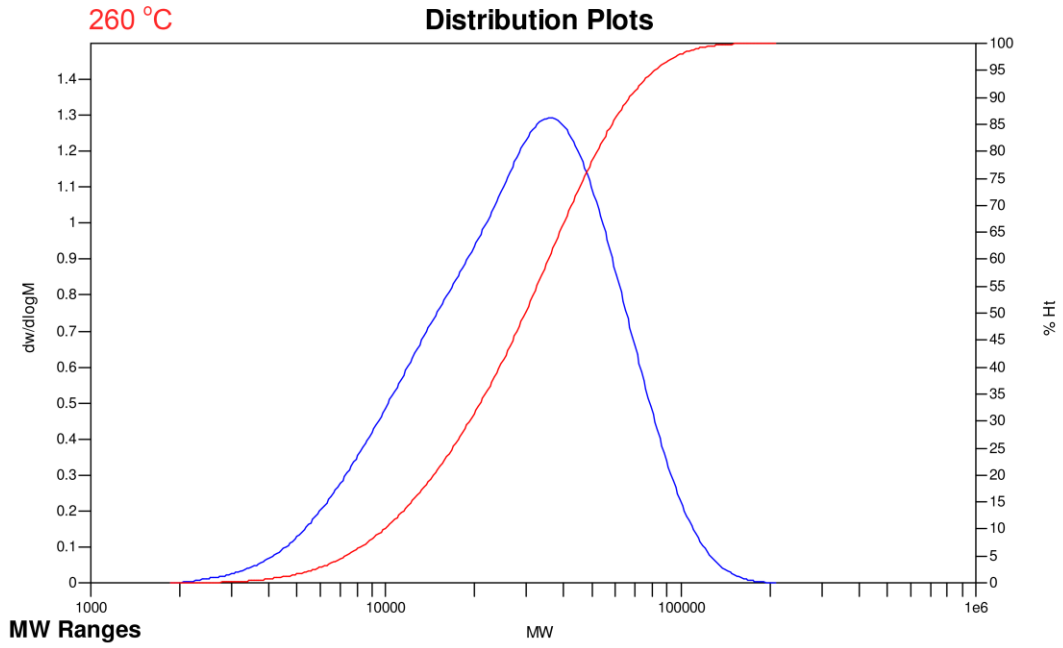

**MW Averages**

Mp: 44026      Mn: 24918      Mv: 42192      Mw: 45389  
Mz: 71218      Mz+1: 118543      PD: 1.8215

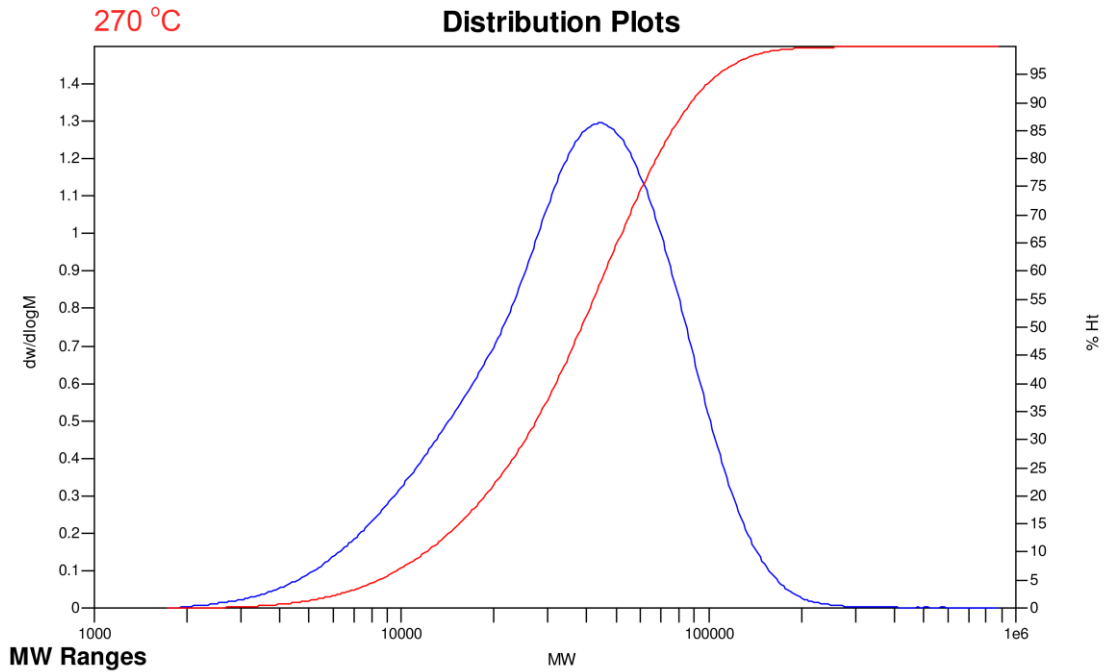



**MW Averages**

Mp: 41751      Mn: 24475      Mv: 40446      Mw: 43323  
Mz: 64649      Mz+1: 88026      PD: 1.7701

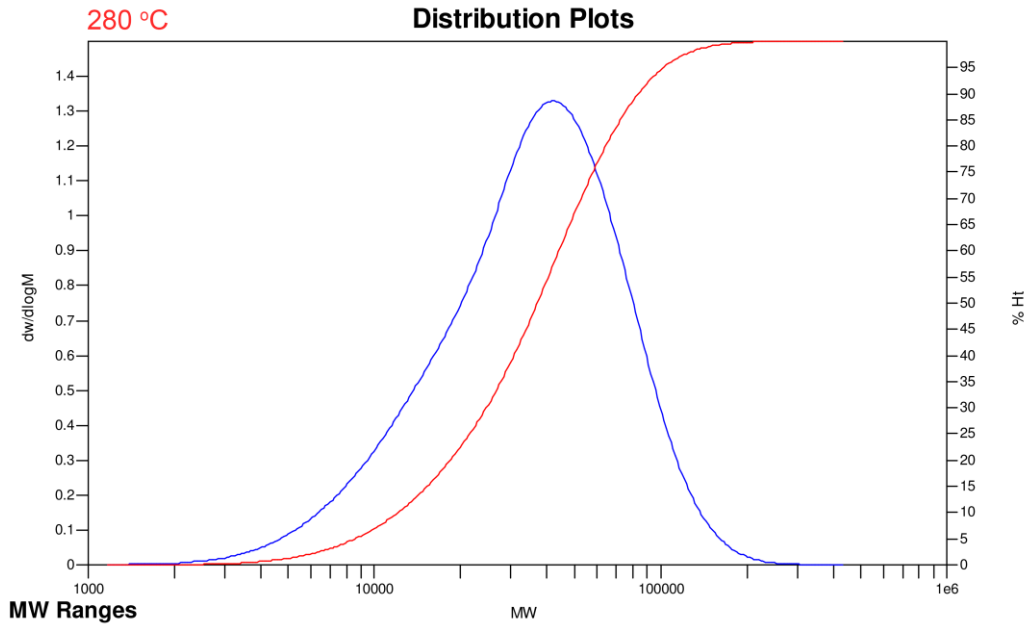

**MW Averages**

Mp: 43254      Mn: 28216      Mv: 42802      Mw: 45534  
Mz: 65664      Mz+1: 86849      PD: 1.6138

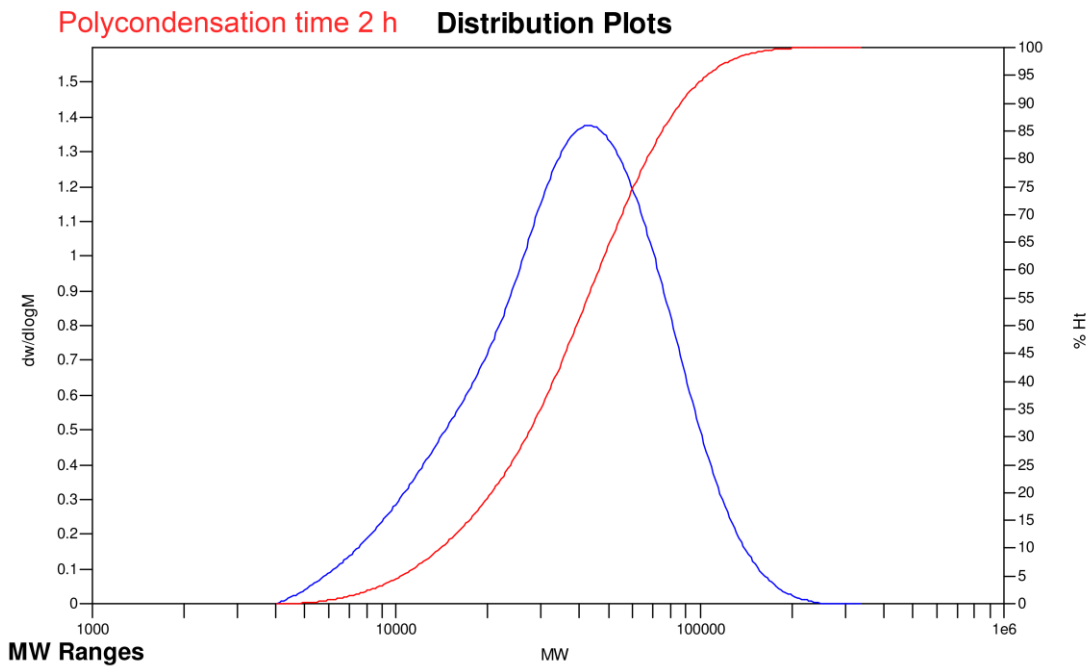

**MW Averages**

Mp: 49829      Mn: 28736      Mv: 48641      Mw: 52138  
Mz: 77666      Mz+1: 104392      PD: 1.8144

**Polycondensation time 3 h      Distribution Plots**

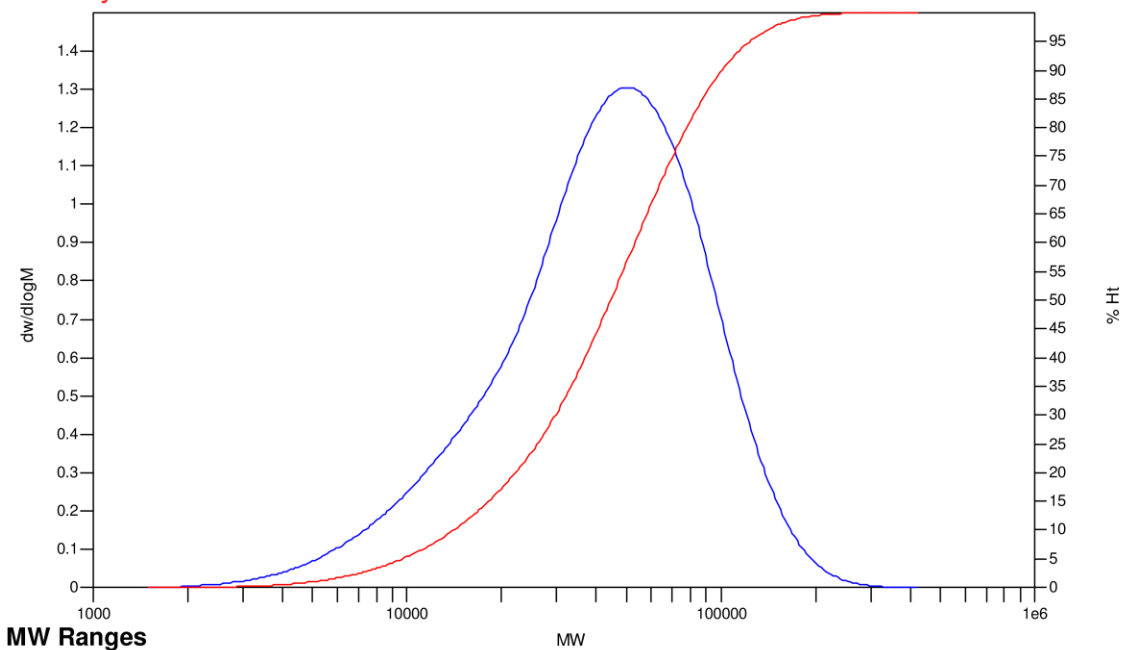

**MW Averages**

Mp: 44026      Mn: 25590      Mv: 42381      Mw: 45477  
Mz: 68479      Mz+1: 93355      PD: 1.7771

**Polycondensation time 4 h      Distribution Plots**

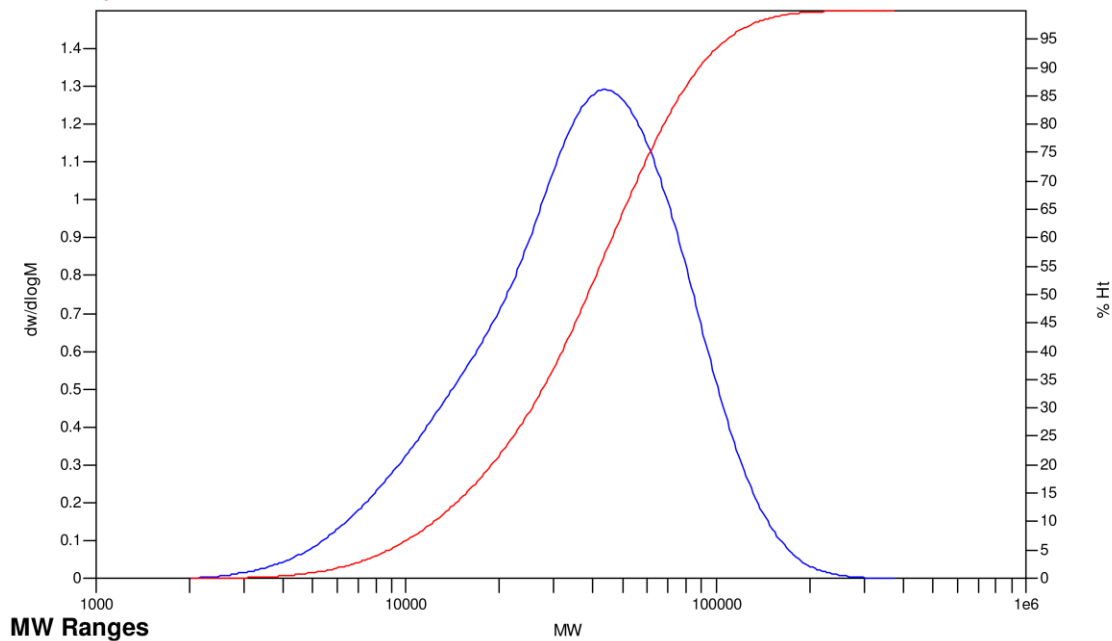

### MW Averages

Mp: 36242

Mn: 19498

Mv: 35098

Mw: 38050

Mz: 61360

Mz+1: 89980

PD: 1.9515

### Polycondensation time 6 h Distribution Plots

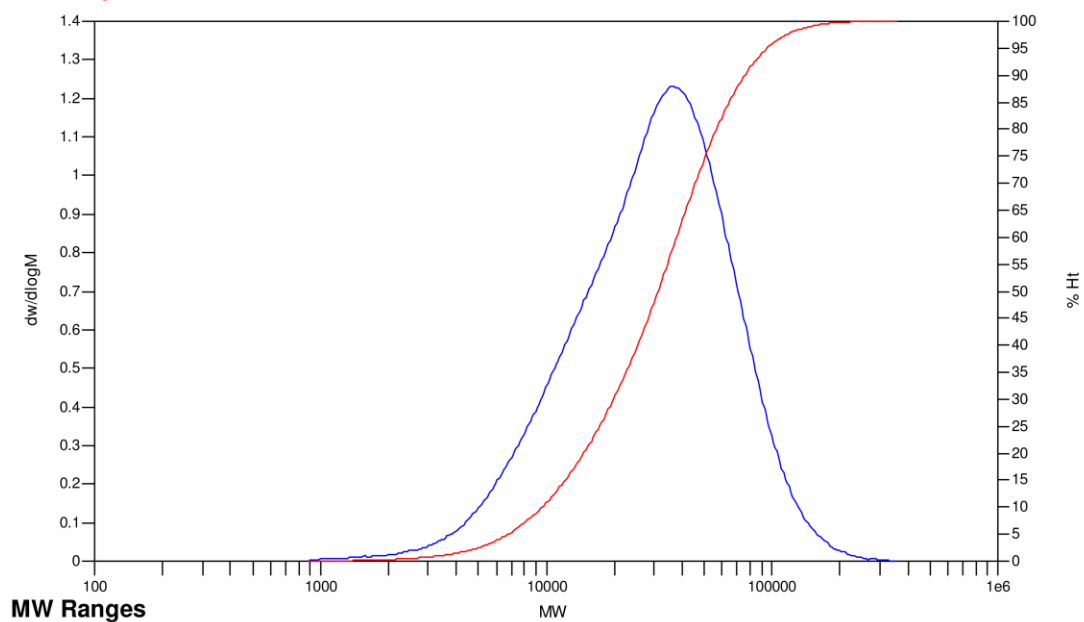

### References

- (1) Qian, W.; Tan, X.; Su, Q.; Cheng, W.; Xu, F.; Dong, L.; Zhang, S. *ChemSusChem* **2019**, *12*, 1169.
